# 1 **Hepatocyte-specific miR-33 deletion attenuates NAFLD-NASH-HCC progression**

2 Pablo Fernández-Tussy<sup>1,2,3</sup>, Jonathan Sun<sup>1,2,3,4</sup>, Magdalena P. Cardelo<sup>1,2,3</sup>, Nathan L. Price<sup>1,2,3,5</sup>,  
3 Leigh Goedeke<sup>6,7</sup>, Chrysovalantou E. Xirouchaki<sup>8,9</sup>, Xiaoyong Yang<sup>2,3,10</sup>, Oscar Pastor-Rojo<sup>1,11</sup>,  
4 Anton M. Bennett<sup>3,12</sup>, Tony Tiganis<sup>9,13</sup>, Yajaira Suárez<sup>1,2,3,4</sup>, Carlos Fernández-Hernando<sup>1,2,3,4,#</sup>.

5  
6 <sup>1</sup>Vascular Biology and Therapeutics Program, Yale University School of Medicine, New Haven,  
7 Connecticut, USA.

8 <sup>2</sup>Department of Comparative Medicine, Yale University School of Medicine, New Haven, Connecticut,  
9 USA.

10 <sup>3</sup>Yale Center for Molecular and System Metabolism, Yale University School of Medicine, New Haven,  
11 Connecticut, USA.

12 <sup>4</sup>Department of Pathology, Yale University School of Medicine, New Haven, Connecticut, USA.

13 <sup>5</sup>Experimental Gerontology Section, Translational Gerontology Branch, National Institute on Aging,  
14 National Institutes of Health, Baltimore, MD 21224, USA.

15 <sup>6</sup>Cardiovascular Research Institute and the Department of Medicine, Cardiology, Icahn School of  
16 Medicine at Mount Sinai, New York, NY, USA.

17 <sup>7</sup>Diabetes, Obesity and Metabolism Institute and the Department of Medicine, Endocrinology, Icahn  
18 School of Medicine at Mount Sinai, New York, NY, USA.

19 <sup>8</sup>Monash Biomedicine Discovery Institute, Monash University, Clayton, Victoria, Australia.

20 <sup>9</sup>Monash University Department of Surgery, Alfred Hospital, Melbourne, Victoria, 3004, Australia.

21 <sup>10</sup>Department of Molecular and Cellular Physiology, Yale University School of Medicine, New Haven,  
22 Connecticut, USA.

23 <sup>11</sup>Servicio de Bioquímica Clínica, Hospital Universitario Ramón y Cajal IRYCIS. 28034 Madrid, Spain.

24 <sup>12</sup>Department of Pharmacology, Yale University School of Medicine, New Haven, Connecticut, USA.

25 <sup>13</sup>Department of Biochemistry and Molecular Biology, Monash University, Clayton, Victoria, Australia.

26

## 27 **Corresponding author:**

28 **#Carlos Fernández-Hernando**, PhD. 10 Amistad Street, Room 337c, New Haven, CT. 06520.

29 Tel: (203) 737-4615. Fax: (203) 737-2290. Email: carlos.fernandez@yale.edu

## 30 **Conflict of interest: NA.**

31

32 **Running Title:** Genetic ablation of miR-33 in hepatocytes protects against NAFLD-NASH-HCC  
33 progression.

34

35

36 **ABSTRACT**

37 The complexity of the multiple mechanisms underlying non-alcoholic fatty liver disease (NAFLD)  
38 progression remains a significant challenge for the development of effective therapeutics.  
39 miRNAs have shown great promise as regulators of biological processes and as therapeutic  
40 targets for complex diseases. Here, we study the role of hepatic miR-33, an important regulator  
41 of lipid metabolism, during the progression of NAFLD. We report that miR-33 is overexpressed in  
42 hepatocytes isolated from mice with NAFLD and demonstrate that its specific suppression in  
43 hepatocytes (miR-33 *HKO*) improves multiple aspects of the disease, including insulin resistance,  
44 steatosis, and inflammation and limits the progression to non-alcoholic steatohepatitis (NASH),  
45 fibrosis and hepatocellular carcinoma (HCC). Mechanistically, we find that hepatic miR-33  
46 deficiency reduces lipid biosynthesis and promotes mitochondrial fatty acid oxidation to reduce  
47 lipid burden in hepatocytes. Additionally, miR-33 deficiency improves mitochondrial function,  
48 reducing oxidative stress. In miR-33 deficient hepatocytes, we found an increase in AMPK $\alpha$   
49 activation, which regulates several pathways resulting in the attenuation of liver disease. The  
50 reduction in lipid accumulation and liver injury resulted in decreased transcriptional activity of the  
51 YAP/TAZ pathway, which may be involved in the reduced progression to HCC in the *HKO* livers.  
52 Together, these results suggest suppressing hepatic miR-33 may be an effective therapeutic  
53 approach at different stages of NAFLD/NASH/HCC disease progression.

54

## 55 INTRODUCTION

56 Non-alcoholic fatty liver disease (NAFLD) is the most common chronic liver disease in the  
57 world, affecting around 25% of the global population (1-8). NAFLD ranges from non-alcoholic fatty  
58 liver (NAFL) to non-alcoholic steatohepatitis (NASH) and can progress to severe fibrosis or  
59 cirrhosis and end-stage liver disease or HCC (9, 10). The rapid increase in NAFLD/NASH  
60 prevalence has paralleled the rise of obesity and diabetes, shifting NASH to the fastest growing  
61 cause of HCC in the World, especially in Western populations (3, 9-12). While the driving force of  
62 hepatic steatosis is the accumulation of fat in the liver, NAFL progression to NASH is influenced  
63 by a wide variety of factors, including genetics, inflammation, oxidative stress, mitochondrial  
64 malfunction, endoplasmic reticulum (ER) stress, lipotoxicity, insulin resistance, and gut dysbiosis  
65 (3, 13, 14).

66 Despite the global health and economic burden associated with NAFLD/NASH, there are  
67 still no approved therapies. Therefore, finding new potential therapeutic options is sorely needed  
68 to halt the progression of the disease and its rapid growth in the world (15, 16). Several studies  
69 have associated NAFLD with multiple metabolic maladaptations (9, 17-19). Impaired  
70 mitochondrial function is one of the most prominent metabolic alterations observed with NAFLD.  
71 Mitochondria are the most important metabolic organelles that carries out oxidative metabolism,  
72 a process that encompasses numerous pathways, including fatty acid  $\beta$ -oxidation (FAO),  
73 tricarboxylic acid (TCA) cycle, electron transport chain (ETC) and adenosine triphosphate (ATP)  
74 generation. Mitochondrial dysfunction can differ depending on the stage of NAFLD, but frequently  
75 includes alterations in mitochondrial number, mtDNA, mitochondrial biogenesis, mitochondrial  
76 dynamics, and mitochondrial recycling (18, 20-26). A coordinated regulation of these processes  
77 is necessary to properly boost mitochondrial activity without detrimental effects associated with  
78 mitochondrial-derived oxidative stress and reactive oxygen species (ROS) formation. On the other  
79 hand, targeting *de novo* lipogenesis (DNL) has also arisen as a therapeutic option to temper

80 NAFLD pathogenesis (27-30). Therefore, due to its complexity and the necessity to hit multiple  
81 pathways (15, 31), combination therapies may be the most effective approaches to treat NAFLD  
82       MicroRNAs (miRNAs) have shown great promise as potential therapeutic targets for the  
83 treatment of metabolic disease, due to their ability to target many mRNAs and pathways  
84 simultaneously (32, 33). Previous work from our group and others identified miR-33 as an intronic  
85 miRNA hosted within the sterol regulatory element-binding protein 2 (*Srebf2*) gene (34-36). miR-  
86 33 has been shown to be an important regulator of metabolism through the regulation of mRNA  
87 transcripts involved in a wide variety of metabolic processes, including lipid and glucose  
88 metabolism (34-41). Notably, miR-33 coordinates the expression of genes associated with  
89 mitochondrial function and homeostasis (38, 42) and increased miR-33 levels in the liver (43) and  
90 serum (44) have been associated with NAFLD in humans.

91       Here, we elucidate a major role of hepatocyte miR-33 in regulating obesity-driven NAFL-  
92 NASH-HCC progression. Genetic ablation of hepatic miR-33 (*HKO*) improves metabolic function  
93 in the liver, enhancing glucose tolerance and insulin sensitivity and attenuating dyslipidemia, fatty  
94 liver, and NASH. In the long term, these improvements contribute to reduced liver injury and HCC  
95 development. Mechanistically, we found that hepatocyte-specific knockout of miR-33 increases  
96 mitochondrial oxidative metabolism and alters mitochondrial dynamics, which correlates with  
97 increased activation of the AMPK $\alpha$  signaling pathway. miR-33 regulation of AMPK $\alpha$  contributes  
98 to the regulation of a subset of downstream targets, including Caspase6 and TAZ, which have  
99 been recently implicated in NASH progression (45-50). Overall, this work indicates that the  
100 specific deletion of miR-33 in hepatocytes is sufficient to regulate several pathways altered  
101 throughout the development of NAFL/NASH/HCC, impeding the progression of the disease.

102

103

104

105

106 **RESULTS**

107 **Loss of hepatic miR-33 improves glucose tolerance, insulin sensitivity and dyslipidemia**  
108 **during obesity-driven NAFL**

109 In order to study the specific role of hepatic miR-33 in NAFL and its progression to NASH  
110 and HCC, we used the previously generated conditional miR-33 knock-out murine model (*miR-*  
111 *33<sup>loxP/loxP</sup>*) bred with an Albumin-Cre to induce miR-33 deletion specifically in hepatocytes (*HKO*)  
112 (51). WT and *HKO* littermates were then fed a choline-deficient, high-fat diet (CD-HFD) for 3, 6  
113 and 15 months to induce simple steatosis/NAFL, steatohepatitis/NASH and HCC, respectively  
114 (**Supplemental Figure 1**), as previously described (52).

115 To investigate the impact of hepatic miR-33 on steatosis (non-alcoholic fatty liver, NAFL),  
116 we first analyzed systemic metabolism and liver function in WT and *HKO* mice after 3 months on  
117 a CD-HFD (**Fig. 1A**). qPCR analysis of freshly isolated hepatocytes confirmed miR-33 deletion in  
118 *HKO* mice, while revealing increased miR-33 levels in diet-induced NAFL in control mice (**Fig.**  
119 **1B**). These findings correlate with recent studies showing enhanced *SREBP2* (the host gene of  
120 miR-33a) transcriptional activation in humans and other mouse models of NAFL (53). We further  
121 confirmed this observation by measuring *SREBP2* and *SREBP1* levels in core liver biopsies from  
122 obese non-steatotic (BMI; 36-61, NAS = 0), obese steatotic (BMI; 36-61, NAS = 1-2) and obese  
123 NASH (BMI; 36-61; NAS>5, fibrosis score = 1-2). The results shown that *SREBP1* and *SREBP2*  
124 expression were markedly elevated in obese steatotic and obese NASH subjects compared to  
125 obese healthy individuals (**Supplemental Figure 1**). As fatty liver and CD-HFD-induced NAFLD  
126 models have been associated with other metabolic dysfunctions, including obesity, dyslipidemia  
127 and insulin resistance, we next sought to determine whether miR-33 deficiency in hepatocytes  
128 influenced obesity-driven NAFLD progression (52). We observed that *HKO* mice gain less weight  
129 compared to WT mice (**Fig. 1C**), which was accompanied by decreased body fat accumulation  
130 (**Fig. 1D**). Circulating lipids, including total cholesterol and HDL-cholesterol were also moderately  
131 reduced in *HKO* mice while no changes were observed in circulating triglycerides (TAGs) (**Fig.**

132 **1E-H)**. Finally, we assessed the regulation of glucose homeostasis and insulin sensitivity in WT  
133 and *HKO* mice by performing glucose and insulin tolerance tests (GTT and ITT). We found that  
134 *HKO* mice showed improved glucose metabolism after 3 months on a CD-HFD (**Fig. 11, J**). These  
135 results agree with our previous study showing improved systemic metabolism in *HKO* mice and  
136 reinforces the metabolic benefit of depleting miR-33 in hepatocytes, independent of the underlying  
137 dietary factors driving fatty liver progression (51).

138

### 139 **Genetic ablation of miR-33 in hepatocytes reduces liver steatosis by enhancing FAO and** 140 **decreasing fatty acid synthesis**

141 Hepatic energy imbalance with concurrent fat accumulation initiates NAFLD (15). Excess  
142 hepatic lipid accumulation results from the dysregulation of one or more pathways leading to an  
143 imbalance between lipid uptake, synthesis and oxidation (9). Thus, we aimed to determine  
144 whether *HKO* mice are protected against NAFLD. Our results showed a marked reduction in  
145 steatosis after feeding mice a CD-HFD for 3 months. Liver/body weight ratio and TAG content  
146 were reduced in *HKO* mice compared to WT mice, which was further confirmed by liver H&E and  
147 Oil Red O staining (**Fig. 2 A-C**). miR-33 is an important post-transcriptional regulator of numerous  
148 genes that participate in FAO (37, 54), thus we first sought to determine if the regulation of FAO  
149 was occurring in our model of steatosis. *Ex vivo* analysis of the rate of [<sup>14</sup>C]-palmitate oxidation  
150 showed increased liver FAO in *HKO* mice (**Fig. 2D**). We further characterized the contribution of  
151 miR-33 to mitochondrial metabolism by measuring the respiratory capacity of freshly isolated  
152 hepatocytes from CD-HFD fed WT and *HKO* mice using a Seahorse Bioanalyzer. This analysis  
153 further confirmed the increase in mitochondrial respiration in hepatocytes lacking miR-33 (**Fig.**  
154 **2E**). Mechanistically, we observed that carnitine O-octanoyltransferase (CROT) and the  
155 mitochondrial fatty acid (FA) transporter, CPT1a, both *bona fide* molecular targets of miR-33 and  
156 key molecules that participate in FAO, were significantly upregulated in *HKO* livers (**Fig. 2F**).

157           Next, we aimed to determine whether hepatocyte miR-33 deficiency influenced *DNL*  
158 during NAFLD progression. To this end, we assessed the activities of fatty acid synthase (FASN)  
159 (the enzyme involved in the synthesis of FAs from acetyl-CoA and malonyl-CoA) and HMG-CoA  
160 reductase (HMGCR) (the rate-limiting enzyme for cholesterol synthesis) in freshly isolated liver  
161 homogenates from WT and *HKO* mice. The results showed a strong trend toward decreased  
162 activity of both enzymes in *HKO* livers (**Fig. 2G**). Consistent with this, we observed that *HKO*  
163 livers had increased Ser79 phosphorylation of Acetyl-CoA carboxylase (ACC) by AMPK $\alpha$  that  
164 inactivates ACC, the rate limiting enzyme for *DNL* (**Fig. 2H**). The increased hepatic FAO and  
165 suppression of *DNL* observed in *HKO* mice correlated with a significant increase in AMPK $\alpha$  levels  
166 and activation (phosphorylation) (**Fig. 2I**). In contrast, the expression and phosphorylation of  
167 AMPK $\beta$  was not altered, suggesting the specificity of this pathway is related to AMPK $\alpha$  in our  
168 model (**Fig. 2I**).

169           Given the profound metabolic alterations observed in miR-33 *HKO* livers, we next  
170 assessed global transcriptomic changes by RNA-seq analysis in the livers of WT and *HKO* mice  
171 aiming to identify specific genes or upstream regulators involved in these functions. We found  
172 1082 differentially expressed genes (DEGs) (421 up-regulated and 661 down-regulated in *HKO*,  
173 *P*<sub>adj.</sub> <0.05), indicating the broad effect that miR-33 deficiency has in the liver during steatosis  
174 initiation (**Fig. 3A**). Interestingly, specific transcriptome analysis for genes involved in metabolic  
175 functions and pathways altered in obesity-driven NAFLD, revealed that gene signatures  
176 associated with FA uptake, FA synthesis and cholesterol homeostasis were altered in *HKO* livers  
177 (**Fig. 3B, C**). Among these, *Abca1* and *Cyp7a1* upregulation in *HKO* livers were of interest, given  
178 their known role in cholesterol and bile acid metabolism and their direct regulation by miR-33.  
179 Finally, we further interrogated our RNA-seq data for changes in well-known specific processes  
180 associated with NAFLD progression, including inflammatory, profibrogenic and CYP450  
181 associated functions (55, 56). We observed downregulation of genes associated with

182 inflammation and fibrogenesis in *HKO* livers, while repression of CYP expression was prevented  
183 **(Fig. 3D)**. Overall, our analysis suggests *miR-33 HKO* mice are protected from NAFLD  
184 progression through the global regulation of metabolic function, including increased FAO and  
185 mitochondrial function and decreased DNL and FA uptake.

186

### 187 **miR-33 deficiency in hepatocytes sustains improved systemic metabolism in diet-induced** 188 **NASH**

189 The adverse outcomes associated with NASH and the ensuing fibrosis include the  
190 progression to cirrhosis and end stage liver disease or HCC (9). Halting this progression is still an  
191 unmet challenge for the development of NASH therapies. Thus, we aimed to explore whether  
192 *miR-33* deficiency in hepatocytes was sufficient to improve NASH. To this end, WT and *HKO* mice  
193 were fed a CD-HFD for 6 months **(Fig. 4A and Supplemental Fig. 1)**. While *miR-33* levels were  
194 still upregulated in NASH-derived hepatocytes compared to littermate controls **(Fig. 4B)**, the mild  
195 effect on body weight was no longer apparent, although body fat was reduced **(Fig. 4C, D)**.  
196 Similarly, a reduction in cholesterol levels was also observed in these mice, but to a lesser extent  
197 when compared to three months of HFD-CD feeding **(Fig. 4E-H)**. Notably, *HKO* mice showed  
198 improved glucose tolerance and insulin sensitivity **(Fig. 4I, J)**.

199

### 200 **miR-33 *HKO* mice are protected from diet-induced NASH and fibrosis**

201 Besides regulation of systemic metabolism, we examined how *miR-33* specifically affects  
202 the liver during NASH. Liver to body weight ratio was reduced in *HKO* mice, and a similar trend  
203 was observed in liver TAG content, counteracting the effect of the obesogenic diet **(Fig. 5A, B)**.  
204 NAFL progression to NASH, a more advanced disease stage, is characterized by a numerous  
205 factors, including macrovesicular fat accumulation, hepatocyte ballooning, inflammation and  
206 hepatocyte death, which results in liver damage and repair leading to different degrees of fibrosis  
207 (13). Immunohistochemistry analysis of H&E-stained liver sections revealed decreased



208 macrovesicular fat content and hepatocyte ballooning in *HKO* livers (**Fig. 5C**), which was further  
209 confirmed by lower liver fat content and fibrosis measured by Oil Red O (ORO) and Sirius Red  
210 staining, respectively (**Fig. 5D**). Consistent with these findings, we observed a significant  
211 reduction of liver fibrosis markers including Fibronectin (FN1), Collagen type  $\alpha 1$  (COL1a1) and  
212 total hydroxyproline content in *HKO* mice (**Fig. 5E, F**). Attenuation of liver fibrosis in the absence  
213 of hepatic miR-33 was not accompanied by significant reduction in liver inflammation as shown  
214 by IHC staining of F4/80+ hepatic macrophages (**Fig. 5D**) and flow cytometry analysis blood and  
215 liver leukocytes, consistent with flow cytometry analysis after 3 months of CD-HFD  
216 (**Supplemental Fig. 2 and 3**). We only observed slight changes in CD4<sup>+</sup> T-cells and neutrophil  
217 presence in the livers. Reduction in liver injury in mice lacking miR-33 in hepatocytes was also  
218 confirmed by measuring serum levels of alanine aminotransferase (ALT) (**Fig. 5G**). Together, our  
219 findings suggest that miR-33 deficiency in hepatocytes protects from diet-induced liver injury and  
220 progression of the disease to a NASH and fibrotic stage.

221 We next characterized the liver metabolic adaptations of *HKO* mice in the context of  
222 NASH. Although we observed increased FAO and decreased FAs in *HKO* mice during the initial  
223 stage, it was not clear whether this improvement could be sustained over the time to contribute  
224 to improved metabolism and liver health. *Ex vivo* measurement of FAO, as well as mitochondrial  
225 respiration, established that these processes were increased in the liver and hepatocytes from  
226 *HKO* mice (**Fig. 6A, B**). In accordance, protein levels of the miR-33 targets CROT and CPT1 $\alpha$   
227 were substantially increased in *HKO* livers (**Fig. 6 D**). Similar to the early stage of disease, we  
228 also found a decrease in *DNL*, as assessed by measuring FASN/HMGCR activity and ACC  
229 protein expression (**Fig. 6C, E**). These metabolic changes were sustained again by the  
230 upregulation of AMPK $\alpha$  activation in *HKO* livers (**Fig. 6F**). Overall, this data suggests that miR-  
231 33 deficiency in hepatocytes is sufficient to increase FAO and decrease FAs, alleviating lipid  
232 overload and mitigating liver injury over a prolonged period of diet induced obesity.

233

234 **miR-33 deficiency in hepatocytes prevents mitochondrial dysfunction associated with**  
235 **NAFLD/NASH progression**

236 Mitochondrial dysfunction underlies the progression of NAFLD-NASH (18, 20-26).  
237 Previous work from our group and others identified miR-33 as a master regulator of mitochondrial  
238 function through the targeting of several genes involved in mitochondrial biogenesis, metabolism,  
239 and homeostasis (41, 42, 57). Notably, we found that miR-33 ablation in hepatocytes improves  
240 their metabolic function and mitochondrial respiratory capacity even under conditions of prolonged  
241 mitochondrial stress. We next aimed to further characterize the molecular mechanism that  
242 mediates the improvement in mitochondrial function observed in miR-33 deficient hepatocytes.  
243 We found increased mitochondrial content in hepatocytes from *HKO* NASH livers, measured by  
244 protein levels of different complexes of the electron transport chain (ETC) and assessing  
245 mitochondrial to nuclear DNA ratio (mtDNA/nDNA) (**Fig. 7A and Supplemental Fig. 4A**). This  
246 effect was found in CD-HFD challenged mice, but not in lean mice fed a chow diet (**Supplemental**  
247 **4Fig. B,**). These findings were further supported by electron microscopy analysis of hepatocytes  
248 from NASH mice, which revealed an increase in the coverage and density of mitochondrial mass,  
249 as well as mitochondrial elongation in *HKO* mice (**Fig. 7C-G**). We also observed enhanced  
250 mitochondrial ETC activity of Complex I and Complex II (**Fig. 7B**). The increase in mitochondrial  
251 mass found in hepatocytes from *HKO* mice correlated with elevated levels of PGC1 $\alpha$ , a  
252 transcription factor targeted by miR-33, mainly known for its role in promoting mitochondrial  
253 biogenesis (58, 59). Moreover, its downstream target TFAM, was also upregulated in miR-33-  
254 deficient livers, suggesting increased mitochondrial biogenesis (**Fig. 7H**). Together, these results  
255 demonstrate that absence of miR-33 in hepatocytes improves mitochondrial function increasing  
256 mitochondrial mass and ETC activity.

257 Mitochondrial homeostasis is a critical checkpoint for the control of mitochondrial health  
258 and metabolism (18, 24, 60). Mitochondrial quality control mechanisms include mitochondrial

259 biogenesis, mitochondrial dynamics to balance fusion and fission processes, and mitophagy.  
260 Dysregulations of all these processes is thought to facilitate NAFLD progression (22, 60). Thus,  
261 we sought to characterize these processes in our NASH model. Mitochondrial number and size  
262 are also controlled through the balance of mitochondrial dynamics, a process that involves fusion  
263 and fission of mitochondrial membranes and has been described in NAFLD (24, 61). We  
264 measured the levels of the most relevant proteins participating in the regulation of fusion/fission  
265 and found an increase in the fusion related proteins MFN2 and OPA1, but no relevant changes  
266 in fission proteins (**Fig. 7I, J**). Importantly, the increase observed in MFN2 levels supports the  
267 changes in mitochondrial shape observed by EM, and correlates also with the increased  
268 respiratory capacity of these mice.

269 Lipid overload and excessive mitochondrial activity have been linked to mitochondrial  
270 dysfunction in NAFLD. Besides the inability to sustain metabolic needs, mitochondrial dysfunction  
271 is responsible for the production of large amounts of reactive oxygen species (ROS), which  
272 increases mitochondrial damage and eventually lead to cell death (62). Although increased  
273 mitochondrial number and activity in *HKO* mice could lead to higher ROS production and damage,  
274 changes in mitochondrial dynamics can also play a role in ROS regulation, membrane potential  
275 and other downstream processes related to mitochondrial stress (24, 60). To determine whether  
276 miR-33 levels in hepatocytes influence ROS production in obesity-driven NAFLD/NASH, we  
277 monitored ROS accumulation in mitochondria from liver sections and observed a decrease in  
278 *HKO* mice (**Fig. 8A**). Liver lipid peroxidation measured by assessing malondialdehyde (MDA) as  
279 a readout of ROS damage also showed a similar decrease in livers from *HKO* mice (**Fig. 8B**). No  
280 significant changes were found in the oxidized or reduced forms of glutathione, or their ratio, and  
281 levels of glutathione peroxidase 4 and peroxiredoxin were also unaffected by loss of miR-33  
282 (**Supplemental Fig. 5A, B and**). However, we noticed a marked increase in glutathione-  
283 reductase activity, a marker of reduced oxidative stress in *HKO* livers, suggesting that changes  
284 in the recycling rather than the synthesis of glutathione may contribute to reduced oxidative stress

285 in these livers (**Fig. 8C**). We also observed nuclear erythroid 2-related factor 2 (NRF2) and  
286 downstream targets such as NQO-1 and HO-1 were also increased in *HKO* mice, while Keap1,  
287 which prevents NRF2 from translocating to the nucleus was downregulated (**Fig. 8D**). Considering  
288 the close link between mitochondrial dynamics, dysfunction, lipid overload and ER stress, we  
289 interrogated *HKO* NASH livers for changes in ER stress response. However, no significant  
290 changes were found in support of a role of miR-33 in regulating ER stress (**Supplemental Fig.**  
291 **5C**). Finally, the ultimate cellular consequence of mitochondrial dysfunction and oxidative stress,  
292 the induction of cell death, was also attenuated in the *HKO* mice under NASH conditions, as seen  
293 by caspase activity and TUNEL staining (**Fig. 8E-G and Supplemental Fig. 5D**). Together, these  
294 findings indicate that miR-33 deficiency in hepatocytes improves mitochondrial quality control  
295 enhancing mitochondrial biogenesis and mitochondrial dynamics, to sustain high rates of  
296 oxidative metabolism without increasing mitochondrial injury and oxidative stress during lipid  
297 overload, protecting against hepatocyte cell death.

298

### 299 **AMPK signaling pathway is increased in miR-33 *HKO* livers**

300 AMPK is a master regulator of metabolism and mitochondrial homeostasis (63). Our  
301 previous results showed that AMPK activation is increased in *HKO* mice compared to WT mice in  
302 both NAFL and NASH stages, counteracting the progressive decrease reported in NAFLD (45).  
303 These results prompted us to characterize additional posttranscriptional mechanisms driving  
304 AMPK regulation in our model. Notably, we found that the activation of liver kinase B1 (LKB1), a  
305 kinase that controls AMPK activity, was enhanced as shown by the increased phosphorylation of  
306 LKB1 at serine 428 in *HKO* livers (**Fig. 9A**). LKB1 activation is regulated by its subcellular  
307 compartment through deacetylation and phosphorylation (64-66), which correlates with increased  
308 levels of protein deacetylases of sirtuins, including SIRT1, SIRT2, SIRT3, SIRT7 and a trend  
309 toward upregulation of SIRT6 (**Fig. 9B**). Sirtuin activity is dependent not only on expression levels

310 but also on the availability of NAD<sup>+</sup>. Accordingly, we detected that total NAD, NAD<sup>+</sup> and  
311 NAD<sup>+</sup>/NADH were increased in *HKO* livers (**Fig. 9C Supplemental Fig. 6A**).

312 These results point towards the increased activation of upstream regulators of AMPK $\alpha$ .  
313 As previously shown in Figure 6, we found increased FAO and decreased FAs, with increased  
314 AMPK $\alpha$ /ACC phosphorylation indicating a broad rewiring of metabolism mediated by AMPK  
315 signaling in *HKO* livers. Similarly, we aimed to characterize if other metabolic pathways regulated  
316 by AMPK were altered in mice lacking miR-33 in hepatocytes. Consistent with our observations  
317 on the effects of AMPK, we found that ULK1 phosphorylation, a downstream target of AMPK $\alpha$   
318 was also increased in *HKO* livers, which along with the increased expression of LC3bII and ATG5  
319 and decreased expression of P62, indicates an increased autophagy flux in *HKO* livers (**Fig. 9D**).

320

### 321 **miR-33 deficiency in hepatocytes reduces NAFLD progression to HCC**

322 To analyze whether the improved metabolic function and protection against NAFLD-NASH  
323 progression attenuates the HCC incidence in *HKO* mice, we fed WT and *HKO* mice a CD-HFD  
324 for 15 months. Tumor quantification revealed a marked decrease in the tumor incidence and  
325 average number of tumors per mouse in *HKO* mice (**Fig. 10A and B**), which was particularly  
326 pronounced in larger tumors (volume >20mm<sup>3</sup>) (**Fig. 10C**). In agreement with reduced tumor  
327 incidence, serum levels of  $\alpha$ -fetoprotein (AFP), a common circulating marker for HCC, were  
328 significantly reduced in *HKO* mice compared to WT mice (**Fig. 10D**). Histological analysis of WT  
329 and *HKO* tumors also revealed a decrease in proliferative Ki67 positive cells in tumors from *HKO*  
330 mice compared to WT mice (**Fig. 10E**). Recent studies have highlighted the role of the gene  
331 regulator TAZ in NASH worsening and progression to HCC (46, 47, 50, 67, 68). YAP/TAZ are  
332 transcriptional coactivators of the Hippo pathway that participate in the initiation and progression  
333 of different cancers (68-70). Specifically, TAZ levels in HCC have been associated with its  
334 initiation and prognosis (50, 67, 71). TAZ upregulation in NASH and HCC has been associated

335 with both increased cholesterol levels and decreased AMPK $\alpha$  activity and it has been described  
336 to participate in the transcriptional regulation of several genes involved in fibrosis, proliferation,  
337 superoxide formation and regulation of metabolism. Its upregulation has been described in pre-  
338 tumor NASH stage (50, 67, 71). In accordance with these studies, we also found a marked  
339 upregulation of TAZ levels in NASH livers that was partially abrogated in mice lacking miR-33 in  
340 hepatocytes (**Fig. 10F**). We further confirmed the activation of TAZ in NASH livers by cellular  
341 fractionation and immunoblotting for its nuclear localization (**Fig. 10G**). In line with this,  
342 downstream TAZ target genes were decreased in *HKO* livers, further suggesting the  
343 downregulation of this pathway (**Fig. 10H**). Based upon our results, we speculated two different  
344 mechanisms could be involved in TAZ downregulation in *HKO* livers: i) YAP/TAZ is a direct target  
345 of AMPK and phosphorylation of TAZ and its partner YAP was increased in *HKO* livers compared  
346 to WT (**Fig. 10I**); ii) cholesterol accumulation in NASH mediates TAZ stabilization and subsequent  
347 activation and we have observed a significant decrease of both total and free cholesterol in *HKO*  
348 livers (**Fig. 10J**), which may also contribute to its regulation. Taken together, our present results  
349 suggest miR-33 deficiency in hepatocytes improves mitochondrial metabolic function, restraining  
350 NAFLD/NASH progression and in the long-term, preventing the development of HCC (**Fig. 11**).  
351

## 352 **DISCUSSION**

353 While the rise in NAFLD and overnutrition approaches pandemic levels in Western  
354 societies, the complexity of the disease has hindered the development of viable therapeutic  
355 options for its treatment. In this study, we demonstrate that miR-33 expression is increased in  
356 hepatocytes at different stages of NAFLD and that the specific deletion of miR-33 in hepatocytes  
357 improves liver function, reducing lipid accumulation in the liver and the progression of the disease.  
358 Work from numerous groups has demonstrated the role of miR-33 in metabolism, including  
359 cholesterol biosynthesis and efflux, triglyceride metabolism, autophagy, glucose and insulin  
360 homeostasis and mitochondrial function (34-42). Those data demonstrated that the inhibition or  
361 deletion of miR-33 was sufficient to reduce the development of atherosclerotic plaques in mice  
362 and non-human primates (38, 39, 72-77). However, due to the promiscuous nature of miRNAs,  
363 whole-body deficiency of miR-33 was associated with obesity, dyslipidemia and insulin resistance  
364 (78, 79). These detrimental effects held up further studies investigating the role of miR-33 in other  
365 metabolic diseases, such as NAFLD. Recently, new strategies to overcome potential undesired  
366 effects of miRNA therapies have been investigated, shedding light on the cell-specific functions  
367 of miR-33 and its therapeutic value. Some of these studies, have demonstrated the efficiency of  
368 delivering miR-33 inhibitors inside pH low insertion peptides (pHLIP) to the kidney and  
369 atherosclerotic lesions (80, 81). Moreover, in a recent study, using a different strategy, our group  
370 also demonstrated the safety and efficiency of specifically removing miR-33 from hepatocytes to  
371 improve cholesterol and FA metabolism, highlighting the role of hepatic miR-33 in liver  
372 metabolism and fibrosis (51). This previous study not only showed that miR-33 suppression in  
373 hepatocytes was not responsible for the adverse metabolic effects observed in whole-body  
374 deficient mice, but that liver specific loss of miR-33 improved whole body metabolism under  
375 hyperlipidemic conditions (51). Taking advantage of this model, in this work, we have focused on  
376 the metabolic benefits associated with miR-33 deficiency in hepatocytes, during

377 NAFLD/NASH/HCC development to interrogate the long-term alterations in liver function under  
378 this chronic inflammatory disease.

379         The initial characterization of miR-33 *HKO* in this CD-HFD model showed a clear impact  
380 on the regulation of cholesterol and glucose metabolism, with almost no effect on body weight,  
381 consistent with previous results found for *HKO* mice on other diets (51). The decrease in steatosis  
382 was related to the regulation of several pathways involved in lipid accumulation in the liver,  
383 including FA uptake, DNL and FAO, as evidenced by *ex vivo* metabolic assays, RNA-sequencing  
384 and protein level analysis performed in *HKO* livers. Further assessment confirmed that *HKO* mice  
385 showed improved liver function regarding glucose and lipid metabolism in advanced stages of  
386 NAFLD, protecting from disease progression in the long term. Our data suggest that these  
387 improvements in liver metabolism that alleviate lipid buildup are primarily responsible for  
388 ameliorating liver injury and progression of the disease, as no other predicted miR-33 targets  
389 associated with fibrosis were found to be dysregulated in our model.

390         One of the most common features in NAFLD and obesity is the inability to sustain  
391 mitochondrial adaptation to nutrient status (18, 20-26, 61). Mitochondria are highly dynamic  
392 organelles with the ability to undergo functional and structural changes in response to  
393 environment and energy requirements (60). However, in NAFLD, as with other metabolic  
394 diseases, high FAO rates to counteract lipid accumulation often results in rapid increases of  
395 oxidative stress and ER stress, resulting in mitochondrial injury, defective oxidative  
396 phosphorylation, and impaired energy production (18, 26, 61, 82). Here, we describe that not only  
397 FAO but also oxidative phosphorylation was increased in miR-33 *HKO* hepatocytes. However, we  
398 did not find increase in oxidative stress was detected in these mice. Further interrogation of  
399 hepatic mitochondria from WT and *HKO* mice fed a CD-HFD for 6 months showed that miR-33  
400 deficiency is associated with dramatic changes in mitochondrial quantity and morphology,  
401 suggesting a broader role of miR-33 in metabolism beyond regulation of cholesterol and FAO.  
402 The observed changes in mitochondria suggest miR-33 *HKO* mice have increased mitochondrial



403 biogenesis and mitochondrial dynamics, mechanisms directed by PGC1 $\alpha$  and MFN2 among other  
404 markers. This mitochondrial phenotype is associated with increased oxidative capacity along with  
405 reduced ROS production and inflammation, resulting in protection from liver injury (24-26, 60).  
406 The combination of the different approaches used here to study mitochondrial turnover and  
407 dynamics suggests both a positive regulation of mitochondrial biogenesis and mitochondrial  
408 fusion; however, as these processes are usually connected to each other, we cannot discard the  
409 dominance of one over the other. Thus, the observed increase in mtDNA and ETC protein  
410 complexes could be a consequence of increased membrane fusion and recycling of mitochondrial  
411 fragments, rather than exclusively a consequence of increased mitochondrial biogenesis.  
412 Moreover, as mitochondria are highly dynamic organelles that respond to the cellular energy  
413 needs, we cannot discount the possibility that the different regulatory processes could occur at  
414 the same time in these livers depending on the specific requirements. Although our data points to  
415 a phenotype with a greater number and more elongated mitochondria to support FAO and ETC  
416 activity, a role for miR-33 in mitochondrial regulation through fission or mitophagy cannot be ruled-  
417 out under these circumstances, such as a situation of increased mitochondrial damage, as these  
418 processes are necessary for the recycling of mitochondrial fragments that cannot be recycled  
419 through fusion (60).

420 Biochemical and metabolic analyses revealed AMPK $\alpha$  activation as a central node in the  
421 protection from NAFLD progression in *HKO* mice. Activation of AMPK $\alpha$  correlated with  
422 downstream pathways, including DNL, FAO, mitochondrial function, autophagy, caspase  
423 activation and YAP/TAZ transcriptional activity (45, 63, 83, 84). YAP/TAZ activation in  
424 hepatocytes plays a central role in liver fibrosis and transition to hepatocellular carcinoma and is  
425 also known to be regulated by lipid accumulation and cholesterol levels (47). Thus, given the  
426 multiple adaptations regulated in *HKO* mice, the decrease observed in YAP/TAZ activation could  
427 be a consequence of AMPK $\alpha$  phosphorylation or an indirect consequence of the decreased

428 cholesterol accumulated in these livers. The exact mechanism by which YAP/TAZ is regulated in  
429 our model remains to be further studied to know the role of AMPK $\alpha$  on YAP/TAZ activation in  
430 hepatocytes.

431 This study will contribute to a better understanding of the mechanisms involved in  
432 NAFLD/NASH progression and how therapeutic interventions could be applied to its treatment.  
433 The role of enhanced FAO as beneficial or detrimental in NAFLD/NASH has been highly  
434 discussed in the past, our results bring new insights into the beneficial role of FAO in the disease.  
435 (15, 25, 31, 85). These findings indicate that the regulation of hepatocyte metabolism by miR-33  
436 is involved in the progression of NAFLD/NASH, as well as NAFLD/NASH-derived HCC and, that  
437 direct targeting of miR-33 in hepatocytes protects from the progression of this disease. This may  
438 be particularly relevant for the use of approaches such as N-acetylgalactosamine–conjugated  
439 antisense oligonucleotides, which have been demonstrated to be effective for targeted delivery of  
440 inhibitors to the liver (86). Regarding human pathology, it is important to note, that while mice  
441 have only the miR-33a isoform of miR-33, humans express both miR-33a and miR-33b isoforms.  
442 While miR-33a is encoded within the *SREBF2* gene, miR-33b is encoded within the *SREBF1*  
443 gene, which is regulated by different mechanisms (87, 88). Moreover, the regulation of both  
444 *SREBF1* and *SREBF2* transcriptional activity has recently been observed in both mice and  
445 human NAFLD (53), suggesting that in human pathology, the miR-33b isoform may also be  
446 contributing to the development of the disease, further escalating the therapeutic potential of  
447 targeting hepatic miR-33 in human pathology.

448 **METHODS**

449 **Animals.** miR-33-knock-out mice (*miR-33<sup>loxP/loxP</sup>*) were generated as previously described by our  
450 laboratory with the assistance of Cyagen Biosciences (51). To generate hepatocyte specific miR-  
451 33-knock-out mice, *miR-33<sup>loxP/loxP</sup>* mice were bred with transgenic mice expressing *Cre*  
452 recombinase under the control of a hepatocyte-specific promoter: Albumin promoter (JAX stock  
453 003574). To produce diet-induced liver disease, mice were fed a standard chow diet until 8 weeks  
454 of age, then chow diet was replaced by modified choline-deficient high fat diet, containing 45% of  
455 fat and no choline added (CD-HFD) (D05010402, Research Diets, USA). Mice were maintained  
456 with CD-HFD feeding for 3, 6 or 15 months to induce simple steatosis (Non-Alcoholic Fatty Liver,  
457 NAFL), steatohepatitis (NASH) or hepatocellular carcinoma (HCC) at respective time points,  
458 according to previous descriptions of the model (52). Body weight was measured throughout diet  
459 feeding studies, and analysis of body composition was performed by Echo MRI (Echo Medical  
460 System). Mice used in all experiments were sex- and age-matched and kept in individually  
461 ventilated cages in a pathogen-free facility. All mice were fasted for 6h at end time point  
462 experiments. All the described experiments were approved by the institutional animal care use  
463 committee of Yale University School of Medicine.

464

465 **Human liver biopsies.**

466 The use of human tissue was approved by the Monash University Human Research Ethics  
467 Committee (CF12/2339-2012001246; CF15/3041-2015001282). All subjects gave their written  
468 consent before participating in this study. Liver core biopsies were from obese men and women  
469 undergoing bariatric surgery have been described previously (89) and were processed for RNA  
470 isolation. Gender differences analyses were not performed due to the low frequency of suitable  
471 donors.

472

473

474 **Lipoprotein profile and circulating lipid measurement.** Mice were fasted for 6h before blood  
475 samples were collected cardiac puncture, and plasma was separated by centrifugation. HDL-C  
476 was isolated by precipitation of non-HDL cholesterol and both HDL-C fractions and total plasma  
477 were stored at  $-80^{\circ}\text{C}$ . Total plasma cholesterol and triglycerides were measured using kits  
478 according to the manufacturer's instructions (Wako Pure Chemicals, Japan). The lipid distribution  
479 in plasma lipoprotein fractions was assessed by fast performance liquid chromatography (FPLC)  
480 gel filtration with 2 Superose 6 HR 10/30 columns (Pharmacia Biotech, Sweden).

481

482 **Glucose and Insulin tolerance test.** GTTs were performed after overnight fasting (16h) by  
483 intraperitoneal (IP) injection of glucose at a dose of 1.5g/kg. Blood glucose was measured at 0-,  
484 15-, 30-, 60- and 120-minutes post injection. ITTs were performed following 6h fasting by IP  
485 injection of 1.5U/kg of insulin. Blood glucose was measured at 0-, 15-, 30-, 60- and 120-minutes  
486 post injection.

487

488 **Liver Triglyceride and cholesterol measurements.** For determining total TAGs content in the  
489 liver, TAGs were extracted using a solvent chloroform/methanol (2:1). TAG level in the liver was  
490 determined by using a commercially available assay kit (Sekisui Chemical Co., USA) according  
491 to the manufacturer's instructions. Determination of liver total and free cholesterol was determined  
492 gas-chromatography coupled with mass spectrometry (GC-MS). Briefly, liver tissue extracts  
493 equivalent to 1 mg/mg.Prot. were mixed with 1.5 ml of methanol/chloroform ( $\text{Cl}_3\text{CH}$ ) mixture (2:1,  
494 v/v) in presence of  $\mu 25$  L of aqueous KOH 50% (w/v). Cholestanol ( $5\alpha$ -cholestan- $3\beta$ -ol, Sigma-  
495 Aldrich, USA) was added on every sample as internal standard. After incubation for 1h at  $90^{\circ}\text{C}$ ,  
496 the saponified lipid extract containing the total cholesterol was extracted with 1 mL of  $\text{Cl}_3\text{CH}$  and  
497 2 mL of water, the lower phase recovered and dried over nitrogen current. Cholesterol was  
498 analyzed by GC-MS as described previously (90). The same extraction protocol, without the  
499 addition of KOH, was done to extract free cholesterol from liver tissues.

500

501 **Fatty acid oxidation (FAO).** Ex vivo FAO was analyzed using [<sup>14</sup>C] palmitate, as previously  
502 described (91). Briefly, livers were isolated from WT and *HKO* and homogenized in five volumes  
503 of chilled STE buffer (10 mM Tris-HCl, 0.25M sucrose, and 1 mM EDTA and pH 7.4). Homogenate  
504 was centrifuged, and the pellet was incubated with reaction mixture (0.5 mmol/L palmitate  
505 conjugated to 7% BSA[<sup>14</sup>C]-palmitate at 0.4 $\mu$ Ci/ml) for 30 minutes. After this incubation, the  
506 resuspended pellet containing the reaction mixture was transferred to an Eppendorf tube, the cap  
507 of which housed a Whatman filter paper disk that had been presoaked with 1 mol/L sodium  
508 hydroxide. The <sup>14</sup>C trapped in the reaction mixture media was then released by acidification of  
509 media using 1 mol/L perchloric acid and gentle agitation of the tubes at 37C for 1h. Radioactivity  
510 that had become absorbed onto the disk was then quantified by liquid scintillation counting in a  
511  $\beta$ -counter.

512

513 **MitoStress test.** Real-time measurements of oxygen consumption rate (OCR) were measured  
514 as previously described using a Seahorse XF24 Extracellular Flux Analyzer (Seahorse  
515 Biosciences, USA), (92). Briefly, WT and *HKO* primary hepatocytes from CD-HFD fed mice at the  
516 indicated time points were isolated by the Yale Liver Center by standard liver perfusion and  
517 collagenase digestion followed by centrifugation of the cell suspension at 60g for 4 minutes to  
518 pellet hepatocytes. Hepatocytes were then cultured in collagen type I coated XF24 cell culture  
519 microplates (Seahorse Bioscience) at 1.5 x10<sup>4</sup> cells per well and incubated 4-6 h at 37 °C. After  
520 that, the cells were washed once in 1x PBS and media was changed to low-glucose assay media  
521 for overnight incubation at 37 °C. The next morning hepatocytes were washed twice with 1 ml XF  
522 Assay Media (DMEM base containing 1 mM pyruvate, 2 mM glutamine and 5.5 mM glucose, pH  
523 7.4) and incubated at 37 °C for 1 h in a non-CO2 incubator. Cells were then assayed on a  
524 Seahorse XFe24 Analyzer following a 12-min equilibration period. Respiration rates were  
525 measured using an instrument protocol of 3-min mix, 2-min wait, and 3-min measure. The

526 following inhibitors were used at the indicated concentration: oligomycin (1  $\mu$ M); carbonyl cyanide  
527 4-trifluoromethoxyphenylhydrazone (FCCP) (1  $\mu$ M); and rotenone (0.5 $\mu$ M)/antimycin (0.5 $\mu$ M).  
528 Flux rates were normalized to total protein content following cell lysis at the end of the assay.

529

530 **Liver Flow Cytometry analysis.** A small piece (250-300  $\mu$ g) of PBS perfused liver was resected  
531 and placed in 2ml cold PBS, then clopped into smaller pieces by mechanical disruption. The  
532 homogenate was then transfer into a gentleMACS C Tube and further dissociated with a  
533 gentleMACS Dissociator (Program liver 1, x2). Homogenate was digested with liver digestion  
534 buffer (5 ml HBSS w/o  $Ca^{2+}/Mg^{2+}$ , 200U/ml Collagenase IV (Worthington, USA) (37 °C, 30mins,  
535 ~60-80 rpm). After digestion, homogenate was filtered through 70  $\mu$ m filter, washed with 10 ml  
536 blocking buffer (HBSS w/o  $Ca^{2+}/Mg^{2+}$ , 2% FBS, 5mM EDTA) and centrifuged at 500g, 5mins, RT.  
537 Pellet was resuspended in 10 ml 20% Percoll and centrifuged 1300g, 30 mins, RT. 13. Pellet was  
538 resuspended in 1mL of HBSS blocking solution and transferred to a 1.5 ml Eppendorf tube, then  
539 centrifuged at 500g, 5 mins, RT. Final pellet was resuspended in 200  $\mu$ l of ACK (155 mM  
540 ammonium chloride, 10 mM potassium bicarbonate, and 0.01 mM EDTA, pH 7.4) and then  
541 stained with a mizture of antibodies. B cells were identified as APC-Cy7 B220 (Biolegend, USA);  
542 T cells were identified as CD4<sup>hi</sup> or CD8<sup>hi</sup> with the following antibodies: BUV395 CD90.2 - 565257  
543 (BD, USA), BV711 CD4 - 100447 (Biolegend), BV605 CD8a - 100744 (Biolegend) and activation  
544 was determined according to CD62L/CD44 status with PE-Cy7 CD62L - 25-0621-82  
545 (eBioscience, USA), BUV737 CD44 - 612799 (BD), BV605 CD8a - 100744 (Biolegend);  
546 macrophages were identified as FITC F480 - 157310 (Biolegend); neutrophils were identified as  
547 CD11b<sup>hi</sup>Ly6G<sup>hi</sup> with Pacific Blue CD11b - 101224 (Biolegend), APC Ly6G - 127614 (Biolegend).  
548 All antibodies were used at 1:300 dilutions.

549

550 **Blood Flow Cytometry analysis.** Blood was collected by heart puncture. For FACS analysis,  
551 erythrocytes were lysed with ACK lysis buffer (155 mM ammonium chloride, 10 mM potassium  
552 bicarbonate, and 0.01 mM EDTA, pH 7.4). White blood cells were resuspended in 3% fetal bovine  
553 serum (FBS) in PBS, blocked with 2  $\mu\text{g mL}^{-1}$  of Fc $\gamma$ RII/III, then stained with a mixture of  
554 antibodies. Monocytes were identified as CD115<sup>hi</sup> and subsets as Ly6-C<sup>hi</sup> and Ly6-C<sup>lo</sup>; neutrophils  
555 were identified as CD11b<sup>hi</sup>Ly6G<sup>hi</sup>; B cells were identified as B220<sup>hi</sup>; T cells were identified as CD4<sup>hi</sup>  
556 or CD8<sup>hi</sup>. All antibodies were used at 1:300 dilutions.

557  
558 **RNA-seq.** Total RNA from livers of control and HKO mice was extracted and purified using a RNA  
559 isolation Kit (Qiagen) followed by DNase treatment to remove genomic contamination using RNA  
560 MinElute Cleanup (Qiagen). The purity and integrity of total RNA sample was verified using the  
561 Agilent Bioanalyzer (Agilent Technologies, Santa Clara, CA). rRNA was depleted from RNA  
562 samples using Ribo-Zero rRNA Removal Kit (Illumina, USA). RNA libraries were performed  
563 TrueSeq Small RNA Library preparation (Illumina) and were sequenced for 45 cycles on Illumina  
564 HiSeq 2000 platform (1 x 75bp read length). The reads obtained from the sequencer are trimmed  
565 for quality using inhouse developed scripts. The trimmed reads were aligned to the reference  
566 genome using TopHat2. The transcript abundances and differences were calculated using cuffdiff.  
567 The results were plotted using R and cummeRbund using in-house developed scripts. RNA-  
568 sequencing data have been deposited in the Gene Expression Omnibus database (GSE220093).

569  
570 **Fatty acid and Cholesterol synthesis.** FASN activity was determined in the liver, as described  
571 previously with some modifications (93). Briefly, liver from WT and *HKO* mice were homogenized  
572 in tissue homogenization buffer (0.1 M Tris, 0.1 M KCl, 350  $\mu\text{M}$  EDTA, and 1 M sucrose, pH 7.5)  
573 containing protease inhibitor cocktail (Roche, USA). The supernatant was collected by  
574 centrifuging liver homogenates at 9,400 g for 10 minutes at 4°C. For determining FASN activity,  
575 Liver homogenate was added to NADPH activity buffer (0.1 M potassium phosphate buffer, pH

576 7.5 containing 1 mM DTT, 25  $\mu$ M acetyl-CoA, and 150  $\mu$ M NADPH). Malonyl-CoA (50  $\mu$ M) was  
577 added to the assay buffer to initiate the reaction. The decrease in the absorbance was followed  
578 at 340 nm for 30 mins at an interval of 1 min using a spectrophotometer set in the kinetic mode  
579 under constant temperature (37°C). HMGCR Activity Assay The HMG-CoA reductase activity  
580 assay was determined according to the protocol described previously (94), with slight  
581 modifications. In Brief, a microsomal fraction from cell lysates and the liver homogenate was  
582 obtained via ultracentrifugation (100000 x g for 60 min). The reaction buffer (0.16 M potassium  
583 phosphate, 0.2 M KCl, 400  $\mu$ M EDTA, and 0.01 M dithiothreitol) containing 100  $\mu$ M NADPH and  
584 microsomal protein (200  $\mu$ g/mL) was prewarmed at 37 °C for 10 min before the reaction. The  
585 reaction was initiated by adding 50  $\mu$ M substrate (HMG-CoA) to the reaction buffer. The decrease  
586 in the absorbance at 340 nm was followed for 30 min with an interval of 1 min.

587

588 **Electron Microscopy and Mitochondrial Analysis.** Sample preparation and imaging was  
589 performed by the Center for Cellular and Molecular Imaging (CCMI) Electron Microscopy Core  
590 Facility at Yale University. Briefly, Liver pieces were fixed with 2.5% glutaraldehyde and 2% PFA  
591 in 0.1 M sodium cacodylate (pH 7.4) for 2 h, RT. Cells were postfixated in 1% OsO<sub>4</sub> in the same  
592 buffer for 1 h, then stained en bloc with 2% aqueous uranyl acetate for 30 min, dehydrated in a  
593 graded series of ethanol to 100%, and embedded in Poly/bed 812 for 24 h. Thin sections (60 nm)  
594 were cut with a Leica ultramicrotome and poststained with uranyl acetate and lead citrate. Digital  
595 images were taken using a Morada charge-coupled device camera fitted with iTEM imaging  
596 software (Olympus). Mitochondria analysis was performed as described previously described  
597 (95). Mitochondria cross-sectional area and mitochondria aspect ratio (major axis divided by  
598 minor axis, minimum value is 1.0) were calculated as a measurement of mitochondria size and  
599 shape, respectively. Probability plots were utilized to estimate changes in mitochondria size and  
600 shape, and statistical differences were tested using Kolmogorov–Smirnov test. Mitochondria  
601 density was estimated by dividing the number of mitochondria profiles by the cytosolic area.



602 Mitochondria coverage was estimated by dividing the total area of mitochondria by the cytosolic  
603 area.

604

605 **DHE.** Dihydroethidium staining was performed in 8 $\mu$ m sections from OCT-embedded livers.  
606 Sections were incubated with MnTBAP (150 $\mu$ M, 1h, RT), stained with DHE (Sigma-Aldrich) (5 $\mu$ M,  
607 30 min, 37 °C) and mounted with VECTASHIELD(R) Antifade Mounting Medium (Vector  
608 Laboratories, USA). Stained area percentage was calculated using ImageJ software.

609

610 **ETC activity complex I and Complex II.** Frozen liver tissues were homogenized with 20mM KP  
611 buffer (pH 7.4) with a glass homogenizer and centrifuged at 800g, 10 mins. Enzyme activities  
612 were measured at 30 °C, monitoring the reaction for at least 2 h and normalizing the changes in  
613 absorbance to CS activity and protein concentration. Complex I activity was measured by tracking  
614 the oxidation of NADH at 340 nm in 20mM KP buffer (pH 8.0) with 200  $\mu$ M NADH, 1mM NaN<sub>3</sub>,  
615 0.1% BSA-EDTA and 100  $\mu$ M ubiquinone-1 with and without rotenone (5  $\mu$ M), to calculate the  
616 rotenone-sensitive rate of NADH oxidation. Complex II was assayed following the reduction of  
617 2,6-dichlorophenolindophenol (DCPIP) at 600 nm. Reaction was set in 50 mM Tris-KP (pH 7.0),  
618 with 1.5 mM KCN, 100  $\mu$ M DCPIP and 32 mM succinate. Citrate synthase (CS) activity was  
619 measured at 420 nm in 75 mM Tris-HCl (pH 8.0) buffer with 100  $\mu$ M DTNM, 350  $\mu$ g/ml acetyl-  
620 CoA, 0.5 mM oxalacetate and 0.1% Triton X-100).

621

622 **Glutathione Reductase Activity.** The reductase activity of glutathione was calculated in liver  
623 homogenates as the reduction of GSSG observed in the presence of NADPH. Briefly, livers were  
624 homogenized in assay buffer (0.2 M KPH, pH 7.0, 2 mM EDTA). Assay was performed to measure  
625 changes in NADPH absorbance at 340 nm. Reaction buffer was prepared as follows: 100  $\mu$ l of  
626 assay buffer were added with 10  $\mu$ l GSSG (20mM) and 10  $\mu$ l NADPH (2 mM) and brought to a

627 final volume of 200  $\mu$ l with H<sub>2</sub>O. Sample was added to reaction solution and absorbance at 340  
628 nm was monitored for at least 30 mins. Changes in absorbance were normalized to protein  
629 concentration in liver lysates.

630

631 **NAD/NADH.** NAD/NADH were measured in liver samples with the NAD/NADH Assay Kit ab65348  
632 (Abcam, UK) following manufacturer's recommendations.

633

634 **Caspase-3 and Caspase-6.** Caspase-3 activity was assayed as previously described (96).  
635 Briefly, livers protein lysates were incubated with fluorescent substrate Ac-DEVD-AMC Caspase-  
636 3 Fluorogenic Substrate (BD Biosciences) at 37°C and the reaction was monitored for at least 4  
637 h to track changes in fluorescence ( $\lambda$  excitation of 390 nm and  $\lambda$  emission of 510 nm). For  
638 Caspase-6 activity assay, similar procedure was followed for colorimetric detection with Caspase-  
639 6 Colorimetric Assay Kit K115 (BioVision, USA), monitoring absorbance at 405 nm.

640

641 **Statistical analysis.** All data are expressed as mean  $\pm$  SEM unless indicated. Statistical  
642 differences were measured using unpaired two-sided Student's *t* test. Normality was checked  
643 using the Kolmogorov–Smirnov test. A value of  $P \leq 0.05$  was considered statistically significant.  
644 Data analysis was performed using GraphPad Prism Software Version 9.0 (GraphPad).

645

646 **Study approval.** Animal experiments were conducted under the ethical guidelines of and  
647 protocols were approved by the IACUC at Yale University School of Medicine (animal protocol  
648 2019-11577).

649

650

651

652

653 **AUTHOR CONTRIBUTION.**

654 PFT, YS and CFH designed the research. PFT, JS, MPC, NLP, LG, CEX, OPR performed  
655 research and analyzed data. XY, AMB, TT analyzed data and edited manuscript. PFT and CFH  
656 wrote the manuscript.

657

658 **ACKNOWLEDGMENTS.** This work was supported by grants from the National Institutes of Health  
659 (R35HL135820 to CF-H; and R35HL155988 to YS and 1K01DK120794 to NLP and  
660 R00HL150234 to LG), the American Heart Association (20TPA35490416 to CF-H and 874771 to  
661 PF-T), Programa Postdoctoral de Perfeccionamiento de Personal del Gobierno Vasco (Spain) (to  
662 PF-T.).

663

664

## 665 REFERENCES

- 666 1. Younossi Z, Tacke F, Arrese M, Chander Sharma B, Mostafa I, Bugianesi E, et al. Global  
667 Perspectives on Nonalcoholic Fatty Liver Disease and Nonalcoholic Steatohepatitis.  
668 *Hepatology*. 2019;69(6):2672-82.
- 669 2. Younossi ZM. Non-alcoholic fatty liver disease - A global public health perspective. *J*  
670 *Hepatol*. 2019;70(3):531-44.
- 671 3. Huang DQ, El-Serag HB, and Loomba R. Global epidemiology of NAFLD-related HCC:  
672 trends, predictions, risk factors and prevention. *Nat Rev Gastroenterol Hepatol*.  
673 2021;18(4):223-38.
- 674 4. Younossi Z, Anstee QM, Marietti M, Hardy T, Henry L, Eslam M, et al. Global burden of  
675 NAFLD and NASH: trends, predictions, risk factors and prevention. *Nat Rev Gastroenterol*  
676 *Hepatol*. 2018;15(1):11-20.
- 677 5. Paik JM, Kabbara K, Eberly KE, Younossi Y, Henry L, and Younossi ZM. Global burden  
678 of NAFLD and chronic liver disease among adolescents and young adults. *Hepatology*.  
679 2022;75(5):1204-17.
- 680 6. Sanyal AJ. Past, present and future perspectives in nonalcoholic fatty liver disease. *Nature*  
681 *Reviews Gastroenterology & Hepatology*. 2019;16(6):377-86.
- 682 7. Lim GEH, Tang A, Ng CH, Chin YH, Lim WH, Tan DJH, et al. An Observational Data Meta-  
683 analysis on the Differences in Prevalence and Risk Factors Between MAFLD vs NAFLD.  
684 *Clin Gastroenterol Hepatol*. 2021.
- 685 8. Quek J, Chan KE, Wong ZY, Tan C, Tan B, Lim WH, et al. Global prevalence of non-  
686 alcoholic fatty liver disease and non-alcoholic steatohepatitis in the overweight and obese  
687 population: a systematic review and meta-analysis. *Lancet Gastroenterol Hepatol*. 2022.
- 688 9. Loomba R, Friedman SL, and Shulman GI. Mechanisms and disease consequences of  
689 nonalcoholic fatty liver disease. *Cell*. 2021;184(10):2537-64.
- 690 10. Younossi Z, Stepanova M, Ong JP, Jacobson IM, Bugianesi E, Duseja A, et al.  
691 Nonalcoholic Steatohepatitis Is the Fastest Growing Cause of Hepatocellular Carcinoma  
692 in Liver Transplant Candidates. *Clin Gastroenterol Hepatol*. 2019;17(4):748-55.e3.
- 693 11. Le MH, Yeo YH, Li X, Li J, Zou B, Wu Y, et al. 2019 Global NAFLD Prevalence: A  
694 Systematic Review and Meta-analysis. *Clin Gastroenterol Hepatol*. 2021.
- 695 12. Huang DQ, Singal AG, Kono Y, Tan DJH, El-Serag HB, and Loomba R. Changing global  
696 epidemiology of liver cancer from 2010 to 2019: NASH is the fastest growing cause of liver  
697 cancer. *Cell Metab*. 2022;34(7):969-77.e2.
- 698 13. Tiniakos DG, Vos MB, and Brunt EM. Nonalcoholic fatty liver disease: pathology and  
699 pathogenesis. *Annu Rev Pathol*. 2010;5:145-71.
- 700 14. Tilg H, and Hotamisligil GS. Nonalcoholic fatty liver disease: Cytokine-adipokine interplay  
701 and regulation of insulin resistance. *Gastroenterology*. 2006;131(3):934-45.
- 702 15. Dufour JF, Anstee QM, Bugianesi E, Harrison S, Loomba R, Paradis V, et al. Current  
703 therapies and new developments in NASH. *Gut*. 2022.
- 704 16. Chalasani N, Younossi Z, Lavine JE, Charlton M, Cusi K, Rinella M, et al. The diagnosis  
705 and management of nonalcoholic fatty liver disease: Practice guidance from the American  
706 Association for the Study of Liver Diseases. *Hepatology*. 2018;67(1):328-57.
- 707 17. Bence KK, and Birnbaum MJ. Metabolic drivers of non-alcoholic fatty liver disease. *Mol*  
708 *Metab*. 2021;50:101143.
- 709 18. Begriche K, Massart J, Robin MA, Bonnet F, and Fromenty B. Mitochondrial adaptations  
710 and dysfunctions in nonalcoholic fatty liver disease. *Hepatology*. 2013;58(4):1497-507.
- 711 19. Yki-Järvinen H. Non-alcoholic fatty liver disease as a cause and a consequence of  
712 metabolic syndrome. *Lancet Diabetes Endocrinol*. 2014;2(11):901-10.

- 713 20. Moore MP, Cunningham RP, Meers GM, Johnson SA, Wheeler AA, Ganga RR, et al.  
714 Compromised hepatic mitochondrial fatty acid oxidation and reduced markers of  
715 mitochondrial turnover in human NAFLD. *Hepatology*. 2022.
- 716 21. Wei Y, Rector RS, Thyfault JP, and Ibdah JA. Nonalcoholic fatty liver disease and  
717 mitochondrial dysfunction. *World J Gastroenterol*. 2008;14(2):193-9.
- 718 22. Longo M, Meroni M, Paolini E, Macchi C, and Dongiovanni P. Mitochondrial dynamics and  
719 nonalcoholic fatty liver disease (NAFLD): new perspectives for a fairy-tale ending?  
720 *Metabolism*. 2021;117:154708.
- 721 23. Sookoian S, Rosselli MS, Gemma C, Burgueño AL, Fernández Gianotti T, Castaño GO,  
722 et al. Epigenetic regulation of insulin resistance in nonalcoholic fatty liver disease: impact  
723 of liver methylation of the peroxisome proliferator-activated receptor  $\gamma$  coactivator 1 $\alpha$   
724 promoter. *Hepatology*. 2010;52(6):1992-2000.
- 725 24. Li R, Toan S, and Zhou H. Role of mitochondrial quality control in the pathogenesis of  
726 nonalcoholic fatty liver disease. *Aging (Albany NY)*. 2020;12(7):6467-85.
- 727 25. Sunny NE, Bril F, and Cusi K. Mitochondrial Adaptation in Nonalcoholic Fatty Liver  
728 Disease: Novel Mechanisms and Treatment Strategies. *Trends Endocrinol Metab*.  
729 2017;28(4):250-60.
- 730 26. Koliaki C, Szendroedi J, Kaul K, Jelenik T, Nowotny P, Jankowiak F, et al. Adaptation of  
731 hepatic mitochondrial function in humans with non-alcoholic fatty liver is lost in  
732 steatohepatitis. *Cell Metab*. 2015;21(5):739-46.
- 733 27. Calle RA, Amin NB, Carvajal-Gonzalez S, Ross TT, Bergman A, Aggarwal S, et al. ACC  
734 inhibitor alone or co-administered with a DGAT2 inhibitor in patients with non-alcoholic  
735 fatty liver disease: two parallel, placebo-controlled, randomized phase 2a trials. *Nat Med*.  
736 2021;27(10):1836-48.
- 737 28. Kim CW, Addy C, Kusunoki J, Anderson NN, Deja S, Fu X, et al. Acetyl CoA Carboxylase  
738 Inhibition Reduces Hepatic Steatosis but Elevates Plasma Triglycerides in Mice and  
739 Humans: A Bedside to Bench Investigation. *Cell Metab*. 2017;26(2):394-406.e6.
- 740 29. Batchuluun B, Pinkosky SL, and Steinberg GR. Lipogenesis inhibitors: therapeutic  
741 opportunities and challenges. *Nat Rev Drug Discov*. 2022;21(4):283-305.
- 742 30. Vijayakumar A, Okesli-Armlovich A, Wang T, Olson I, Seung M, Kusam S, et al.  
743 Combinations of an acetyl CoA carboxylase inhibitor with hepatic lipid modulating agents  
744 do not augment antifibrotic efficacy in preclinical models of NASH and fibrosis. *Hepatol*  
745 *Commun*. 2022.
- 746 31. Dufour JF, Caussy C, and Loomba R. Combination therapy for non-alcoholic  
747 steatohepatitis: rationale, opportunities and challenges. *Gut*. 2020;69(10):1877-84.
- 748 32. Gjorgjieva M, Sobolewski C, Dolicka D, Correia de Sousa M, and Foti M. miRNAs and  
749 NAFLD: from pathophysiology to therapy. *Gut*. 2019;68(11):2065-79.
- 750 33. Rottiers V, and Naar AM. MicroRNAs in metabolism and metabolic disorders. *Nat Rev Mol*  
751 *Cell Biol*. 2012;13(4):239-50.
- 752 34. Rayner KJ, Suarez Y, Davalos A, Parathath S, Fitzgerald ML, Tamehiro N, et al. MiR-33  
753 contributes to the regulation of cholesterol homeostasis. *Science*. 2010;328(5985):1570-  
754 3.
- 755 35. Marquart TJ, Allen RM, Ory DS, and Baldan A. miR-33 links SREBP-2 induction to  
756 repression of sterol transporters. *Proc Natl Acad Sci U S A*. 2010;107(27):12228-32.
- 757 36. Najafi-Shoushtari SH, Kristo F, Li Y, Shioda T, Cohen DE, Gerszten RE, et al. MicroRNA-  
758 33 and the SREBP host genes cooperate to control cholesterol homeostasis. *Science*.  
759 2010;328(5985):1566-9.
- 760 37. Dávalos A, Goedeke L, Smibert P, Ramírez CM, Warriar NP, Andreo U, et al. miR-33a/b  
761 contribute to the regulation of fatty acid metabolism and insulin signaling. *Proceedings of*  
762 *the National Academy of Sciences*. 2011;108(22):9232-7.

- 763 38. Karunakaran D, Thrush AB, Nguyen MA, Richards L, Geoffrion M, Singaravelu R, et al.  
764 Macrophage Mitochondrial Energy Status Regulates Cholesterol Efflux and Is Enhanced  
765 by Anti-miR33 in Atherosclerosis. *Circ Res*. 2015;117(3):266-78.
- 766 39. Ouimet M, Ediriweera HN, Gundra UM, Sheedy FJ, Ramkhalawon B, Hutchison SB, et al.  
767 MicroRNA-33-dependent regulation of macrophage metabolism directs immune cell  
768 polarization in atherosclerosis. *J Clin Invest*. 2015;125(12):4334-48.
- 769 40. Ouimet M, Ediriweera H, Afonso MS, Ramkhalawon B, Singaravelu R, Liao X, et al.  
770 microRNA-33 Regulates Macrophage Autophagy in Atherosclerosis. *Arterioscler Thromb*  
771 *Vasc Biol*. 2017;37(6):1058-67.
- 772 41. Ramirez CM, Goedeke L, Rotllan N, Yoon JH, Cirera-Salinas D, Mattison JA, et al.  
773 MicroRNA 33 regulates glucose metabolism. *Mol Cell Biol*. 2013;33(15):2891-902.
- 774 42. Nie H, Yu X, He H, Zhou L, Li Q, Song C, et al. Hepatocyte miR-33a mediates  
775 mitochondrial dysfunction and hepatosteatosis by suppressing NDUFA5. *J Cell Mol Med*.  
776 2018;22(12):6285-93.
- 777 43. Vega-Badillo J, Gutiérrez-Vidal R, Hernández-Pérez HA, Villamil-Ramírez H, León-Mimila  
778 P, Sánchez-Muñoz F, et al. Hepatic miR-33a/miR-144 and their target gene ABCA1 are  
779 associated with steatohepatitis in morbidly obese subjects. *Liver Int*. 2016;36(9):1383-91.
- 780 44. Erhartova D, Cahova M, Dankova H, Heczko M, Mikova I, Sticova E, et al. Serum miR-  
781 33a is associated with steatosis and inflammation in patients with non-alcoholic fatty liver  
782 disease after liver transplantation. *PLoS One*. 2019;14(11):e0224820.
- 783 45. Zhao P, Sun X, Chaggaan C, Liao Z, In Wong K, He F, et al. An AMPK-caspase-6 axis  
784 controls liver damage in nonalcoholic steatohepatitis. *Science*. 2020;367(6478):652-60.
- 785 46. Wang X, Zheng Z, Caviglia JM, Corey KE, Herfel TM, Cai B, et al. Hepatocyte  
786 TAZ/WWTR1 Promotes Inflammation and Fibrosis in Nonalcoholic Steatohepatitis. *Cell*  
787 *Metab*. 2016;24(6):848-62.
- 788 47. Wang X, Cai B, Yang X, Sonubi OO, Zheng Z, Ramakrishnan R, et al. Cholesterol  
789 Stabilizes TAZ in Hepatocytes to Promote Experimental Non-alcoholic Steatohepatitis.  
790 *Cell Metab*. 2020;31(5):969-86.e7.
- 791 48. Alsamman S, Christenson SA, Yu A, Ayad NME, Mooring MS, Segal JM, et al. Targeting  
792 acid ceramidase inhibits YAP/TAZ signaling to reduce fibrosis in mice. *Sci Transl Med*.  
793 2020;12(557).
- 794 49. Wang X, Sommerfeld MR, Jahn-Hofmann K, Cai B, Filliol A, Remotti HE, et al. A  
795 Therapeutic Silencing RNA Targeting Hepatocyte TAZ Prevents and Reverses Fibrosis in  
796 Nonalcoholic Steatohepatitis in Mice. *Hepatol Commun*. 2019;3(9):1221-34.
- 797 50. Wang X, Zeldin S, Shi H, Zhu C, Saito Y, Corey KE, et al. TAZ-induced Cybb contributes  
798 to liver tumor formation in non-alcoholic steatohepatitis. *J Hepatol*. 2022;76(4):910-20.
- 799 51. Price NL, Zhang X, Fernandez-Tussy P, Singh AK, Burnap SA, Rotllan N, et al. Loss of  
800 hepatic miR-33 improves metabolic homeostasis and liver function without altering body  
801 weight or atherosclerosis. *Proc Natl Acad Sci U S A*. 2021;118(5).
- 802 52. Wolf MJ, Adili A, Piotrowitz K, Abdullah Z, Boege Y, Stemmer K, et al. Metabolic activation  
803 of intrahepatic CD8+ T cells and NKT cells causes nonalcoholic steatohepatitis and liver  
804 cancer via cross-talk with hepatocytes. *Cancer Cell*. 2014;26(4):549-64.
- 805 53. Yang H, Arif M, Yuan M, Li X, Shong K, Türkez H, et al. A network-based approach reveals  
806 the dysregulated transcriptional regulation in non-alcoholic fatty liver disease. *iScience*.  
807 2021;24(11):103222.
- 808 54. Gerin I, Clerbaux LA, Haumont O, Lanthier N, Das AK, Burant CF, et al. Expression of  
809 miR-33 from an SREBP2 intron inhibits cholesterol export and fatty acid oxidation. *J Biol*  
810 *Chem*. 2010;285(44):33652-61.
- 811 55. Hou J, Zhang J, Cui P, Zhou Y, Liu C, Wu X, et al. TREM2 sustains macrophage-  
812 hepatocyte metabolic coordination in nonalcoholic fatty liver disease and sepsis. *J Clin*  
813 *Invest*. 2021;131(4).

- 814 56. van Koppen A, Verschuren L, van den Hoek AM, Verheij J, Morrison MC, Li K, et al.  
815 Uncovering a Predictive Molecular Signature for the Onset of NASH-Related Fibrosis in a  
816 Translational NASH Mouse Model. *Cell Mol Gastroenterol Hepatol*. 2018;5(1):83-98.e10.  
817 57. Price NL, and Fernández-Hernando C. Novel Role of miR-33 in Regulating of  
818 Mitochondrial Function. *Circ Res*. 2015;117(3):225-8.  
819 58. Wu Z, Puigserver P, Andersson U, Zhang C, Adelmant G, Mootha V, et al. Mechanisms  
820 controlling mitochondrial biogenesis and respiration through the thermogenic coactivator  
821 PGC-1. *Cell*. 1999;98(1):115-24.  
822 59. Piccinin E, Villani G, and Moschetta A. Metabolic aspects in NAFLD, NASH and  
823 hepatocellular carcinoma: the role of PGC1 coactivators. *Nature Reviews*  
824 *Gastroenterology & Hepatology*. 2019;16(3):160-74.  
825 60. Picca A, Mankowski RT, Burman JL, Donisi L, Kim J-S, Marzetti E, et al. Mitochondrial  
826 quality control mechanisms as molecular targets in cardiac ageing. *Nature Reviews*  
827 *Cardiology*. 2018;15(9):543-54.  
828 61. Nassir F, and Ibdah JA. Role of mitochondria in nonalcoholic fatty liver disease. *Int J Mol*  
829 *Sci*. 2014;15(5):8713-42.  
830 62. Zhao RZ, Jiang S, Zhang L, and Yu ZB. Mitochondrial electron transport chain, ROS  
831 generation and uncoupling (Review). *Int J Mol Med*. 2019;44(1):3-15.  
832 63. Herzig S, and Shaw RJ. AMPK: guardian of metabolism and mitochondrial homeostasis.  
833 *Nature Reviews Molecular Cell Biology*. 2018;19(2):121-35.  
834 64. Yang SJ, Choi JM, Chae SW, Kim WJ, Park SE, Rhee EJ, et al. Activation of peroxisome  
835 proliferator-activated receptor gamma by rosiglitazone increases sirt6 expression and  
836 ameliorates hepatic steatosis in rats. *PLoS One*. 2011;6(2):e17057.  
837 65. Yang SJ, Choi JM, Chang E, Park SW, and Park CY. Sirt1 and Sirt6 mediate beneficial  
838 effects of rosiglitazone on hepatic lipid accumulation. *PLoS One*. 2014;9(8):e105456.  
839 66. Hou X, Xu S, Maitland-Toolan KA, Sato K, Jiang B, Ido Y, et al. SIRT1 regulates  
840 hepatocyte lipid metabolism through activating AMP-activated protein kinase. *J Biol*  
841 *Chem*. 2008;283(29):20015-26.  
842 67. Moon H, Park H, Chae MJ, Choi HJ, Kim DY, and Ro SW. Activated TAZ induces liver  
843 cancer in collaboration with EGFR/HER2 signaling pathways. *BMC Cancer*.  
844 2022;22(1):423.  
845 68. Moya IM, Castaldo SA, Van den Mooter L, Soheily S, Sansores-Garcia L, Jacobs J, et al.  
846 Peritumoral activation of the Hippo pathway effectors YAP and TAZ suppresses liver  
847 cancer in mice. *Science*. 2019;366(6468):1029-34.  
848 69. Zanconato F, Cordenonsi M, and Piccolo S. YAP/TAZ at the Roots of Cancer. *Cancer*  
849 *Cell*. 2016;29(6):783-803.  
850 70. Moroishi T, Hansen CG, and Guan K-L. The emerging roles of YAP and TAZ in cancer.  
851 *Nature Reviews Cancer*. 2015;15(2):73-9.  
852 71. Hagenbeek TJ, Webster JD, Kljavin NM, Chang MT, Pham T, Lee H-J, et al. The Hippo  
853 pathway effector TAZ induces TEAD-dependent liver inflammation and tumors. *Science*  
854 *Signaling*. 2018;11(547):eaaj1757.  
855 72. Rayner KJ, Esau CC, Hussain FN, McDaniel AL, Marshall SM, van Gils JM, et al. Inhibition  
856 of miR-33a/b in non-human primates raises plasma HDL and lowers VLDL triglycerides.  
857 *Nature*. 2011;478(7369):404-7.  
858 73. Rottiers V, Obad S, Petri A, McGarrah R, Lindholm MW, Black JC, et al. Pharmacological  
859 inhibition of a microRNA family in nonhuman primates by a seed-targeting 8-mer antimiR.  
860 *Sci Transl Med*. 2013;5(212):212ra162.  
861 74. Rayner KJ, Sheedy FJ, Esau CC, Hussain FN, Temel RE, Parathath S, et al. Antagonism  
862 of miR-33 in mice promotes reverse cholesterol transport and regression of  
863 atherosclerosis. *J Clin Invest*. 2011;121(7):2921-31.

- 864 75. Rotllan N, Ramirez CM, Aryal B, Esau CC, and Fernandez-Hernando C. Therapeutic  
865 silencing of microRNA-33 inhibits the progression of atherosclerosis in Ldlr-/- mice--brief  
866 report. *Arterioscler Thromb Vasc Biol.* 2013;33(8):1973-7.
- 867 76. Distel E, Barrett TJ, Chung K, Girgis NM, Parathath S, Essau CC, et al. miR33 inhibition  
868 overcomes deleterious effects of diabetes mellitus on atherosclerosis plaque regression  
869 in mice. *Circ Res.* 2014;115(9):759-69.
- 870 77. Price NL, Rotllan N, Canfrán-Duque A, Zhang X, Pati P, Arias N, et al. Genetic Dissection  
871 of the Impact of miR-33a and miR-33b during the Progression of Atherosclerosis. *Cell*  
872 *Rep.* 2017;21(5):1317-30.
- 873 78. Horie T, Nishino T, Baba O, Kuwabara Y, Nakao T, Nishiga M, et al. MicroRNA-33  
874 regulates sterol regulatory element-binding protein 1 expression in mice. *Nat Commun.*  
875 2013;4:2883.
- 876 79. Goedeke L, Vales-Lara FM, Fenstermaker M, Cirera-Salinas D, Chamorro-Jorganes A,  
877 Ramírez CM, et al. A regulatory role for microRNA 33\* in controlling lipid metabolism gene  
878 expression. *Mol Cell Biol.* 2013;33(11):2339-52.
- 879 80. Zhang X, Rotllan N, Canfrán-Duque A, Sun J, Toczek J, Moshnikova A, et al. Targeted  
880 Suppression of miRNA-33 Using pHLIP Improves Atherosclerosis Regression. *Circ Res.*  
881 2022;131(1):77-90.
- 882 81. Price NL, Miguel V, Ding W, Singh AK, Malik S, Rotllan N, et al. Genetic deficiency or  
883 pharmacological inhibition of miR-33 protects from kidney fibrosis. *JCI Insight.* 2019;4(22).
- 884 82. Simões ICM, Fontes A, Pinton P, Zischka H, and Wieckowski MR. Mitochondria in non-  
885 alcoholic fatty liver disease. *Int J Biochem Cell Biol.* 2018;95:93-9.
- 886 83. Mo JS, Meng Z, Kim YC, Park HW, Hansen CG, Kim S, et al. Cellular energy stress  
887 induces AMPK-mediated regulation of YAP and the Hippo pathway. *Nat Cell Biol.*  
888 2015;17(4):500-10.
- 889 84. Strzyz P. AMPK against NASH. *Nature Reviews Molecular Cell Biology.* 2020;21(4):181-  
890 .
- 891 85. Xu X, Poulsen KL, Wu L, Liu S, Miyata T, Song Q, et al. Targeted therapeutics and novel  
892 signaling pathways in non-alcohol-associated fatty liver/steatohepatitis (NAFL/NASH).  
893 *Signal Transduction and Targeted Therapy.* 2022;7(1):287.
- 894 86. Prakash TP, Graham MJ, Yu J, Carty R, Low A, Chappell A, et al. Targeted delivery of  
895 antisense oligonucleotides to hepatocytes using triantennary N-acetyl galactosamine  
896 improves potency 10-fold in mice. *Nucleic Acids Res.* 2014;42(13):8796-807.
- 897 87. Brown MS, and Goldstein JL. The SREBP pathway: regulation of cholesterol metabolism  
898 by proteolysis of a membrane-bound transcription factor. *Cell.* 1997;89(3):331-40.
- 899 88. Nishino T, Horie T, Baba O, Sowa N, Hanada R, Kuwabara Y, et al. SREBF1/MicroRNA-  
900 33b Axis Exhibits Potent Effect on Unstable Atherosclerotic Plaque Formation In Vivo.  
901 *Arterioscler Thromb Vasc Biol.* 2018;38(10):2460-73.
- 902 89. Grohmann M, Wiede F, Dodd GT, Gurzov EN, Ooi GJ, Butt T, et al. Obesity Drives STAT-  
903 1-Dependent NASH and STAT-3-Dependent HCC. *Cell.* 2018;175(5):1289-306 e20.
- 904 90. Araldi E, Fernández-Fuertes M, Canfrán-Duque A, Tang W, Cline GW, Madrigal-Matute  
905 J, et al. Lanosterol Modulates TLR4-Mediated Innate Immune Responses in  
906 Macrophages. *Cell Rep.* 2017;19(13):2743-55.
- 907 91. Huynh FK, Green MF, Koves TR, and Hirschey MD. Measurement of fatty acid oxidation  
908 rates in animal tissues and cell lines. *Methods Enzymol.* 2014;542:391-405.
- 909 92. Fernández-Tussy P, Fernández-Ramos D, Lopitz-Otsoa F, Simón J, Barbier-Torres L,  
910 Gomez-Santos B, et al. miR-873-5p targets mitochondrial GNMT-Complex II interface  
911 contributing to non-alcoholic fatty liver disease. *Mol Metab.* 2019;29:40-54.
- 912 93. Bays NW, Hill AD, and Kariv I. A simplified scintillation proximity assay for fatty acid  
913 synthase activity: development and comparison with other FAS activity assays. *J Biomol*  
914 *Screen.* 2009;14(6):636-42.



- 915 94. Kleinsek DA, Ranganathan S, and Porter JW. Purification of 3-hydroxy-3-methylglutaryl-  
916 coenzyme A reductase from rat liver. *Proc Natl Acad Sci U S A*. 1977;74(4):1431-5.  
917 95. Dietrich MO, Liu ZW, and Horvath TL. Mitochondrial dynamics controlled by mitofusins  
918 regulate Agrp neuronal activity and diet-induced obesity. *Cell*. 2013;155(1):188-99.  
919 96. Fernández-Ramos D, Fernández-Tussy P, Lopitz-Otsoa F, Gutiérrez-de-Juan V, Navasa  
920 N, Barbier-Torres L, et al. MiR-873-5p acts as an epigenetic regulator in early stages of  
921 liver fibrosis and cirrhosis. *Cell Death & Disease*. 2018;9(10):958.

922

923

924

925

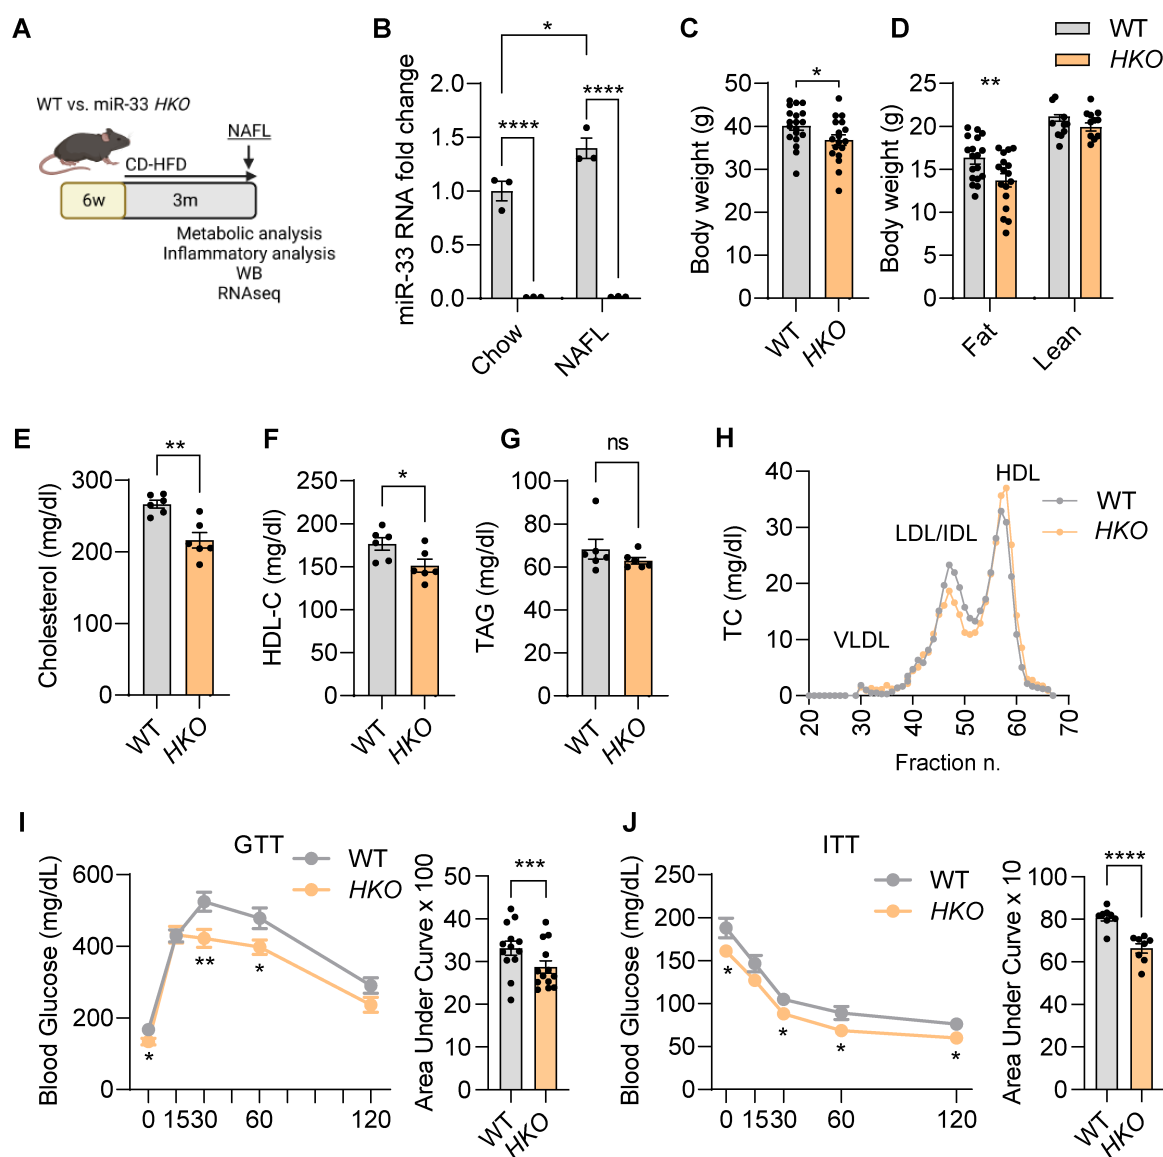

**Figure 1. miR-33 deficiency in hepatocytes improves systemic metabolism in NAFL.** (A) Schematic representation of the experimental design to analyze steatosis/NAFL in WT and hepatocyte specific miR-33 knockout (*HKO*) mice fed with CD-HFD for 3 months. (B) qPCR analysis of miR-33 expression in WT and *HKO* hepatocytes fed a control and CD-HFD for 3 months. (C, D) Body weight (C) and body composition (D) analysis WT and *HKO* mice. (E-G) Levels of total cholesterol (E), HDL-C (F), and TAGs (G) in plasma of WT and *HKO* mice. (H) Cholesterol content of FPLC-fractionated lipoproteins from pooled plasma of 6 WT and 6 *HKO* mice. (I, J) GTT (I) and ITT (J) in WT and *HKO* mice with areas under the curve. Data represent the mean  $\pm$  SEM (\* $P \leq 0.05$ , \*\* $P \leq 0.01$ , \*\*\* $P \leq 0.001$ , \*\*\*\* $P \leq 0.0001$  compared with WT animals, 2-way ANOVA followed by Tukey's multiple comparison (B) and unpaired Student's *t* test for 2 group comparisons).

926

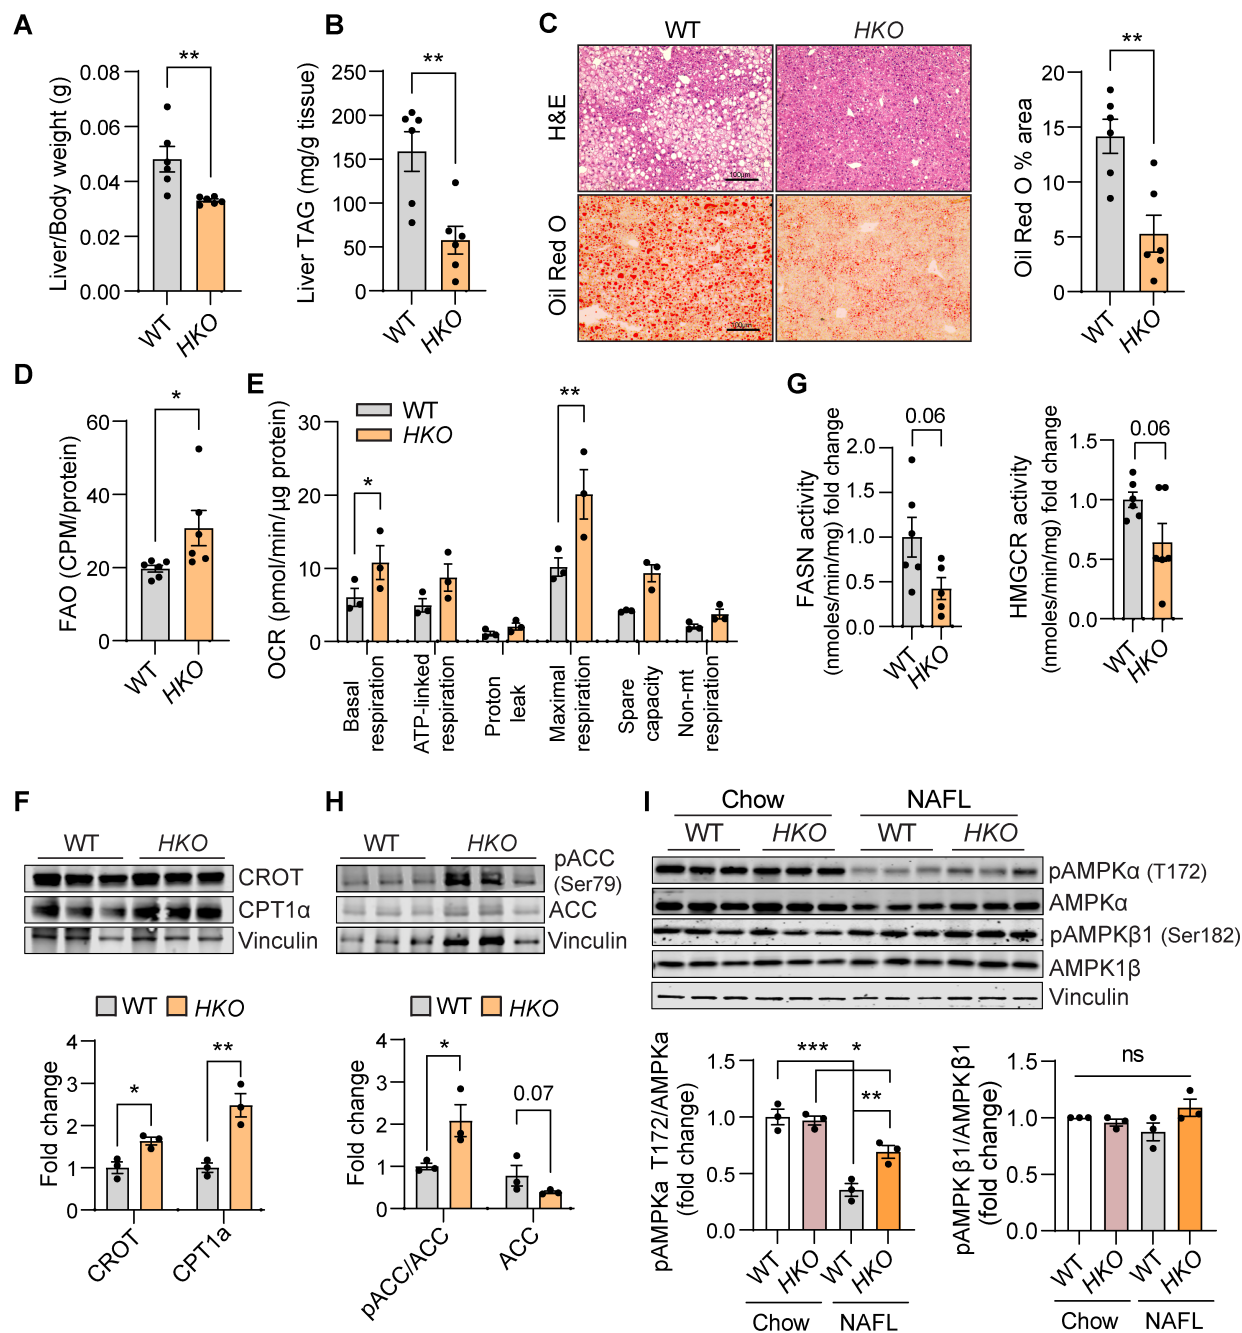

**Figure 2. miR-33 deficiency in hepatocytes reduces liver steatosis and regulates metabolic pathways. (A, B)** Liver weight **(A)** and liver TAG **(B)** in WT and hepatocyte specific miR-33 knockout (*HKO*) mice fed with CD-HFD for 3 months. **(C)** Representative images of H&E and Oil Red O (ORO)-stained livers from WT and *HKO* mice and quantification of ORO staining. **(D)** Ex vivo Analysis of FAO in WT and *HKO* livers. **(E)** Mitochondrial respiratory analysis inferred from OCR measurements of primary mouse hepatocytes isolated from WT and miR-33 *HKO* livers. **(G)** Enzymatic activity of FASN and HMGCR in WT and *HKO* liver microsomes. **(F, H, I)** Western blot and densitometric analysis of CROT, CPT1α, pACC (Ser79), total ACC, pAMPKα (T172), total AMPKα, pAMPKβ (Ser182), AMPKβ and housekeeping standard VINCULIN in WT and *HKO* livers. Data represent the mean ± SEM (\* $P \leq 0.05$ , \*\* $P \leq 0.01$ , \*\*\* $P \leq 0.001$  compared with WT animals, unpaired Student's *t* test for 2 group comparisons and 2-way ANOVA followed by Tukey's multiple comparison **(I)**).

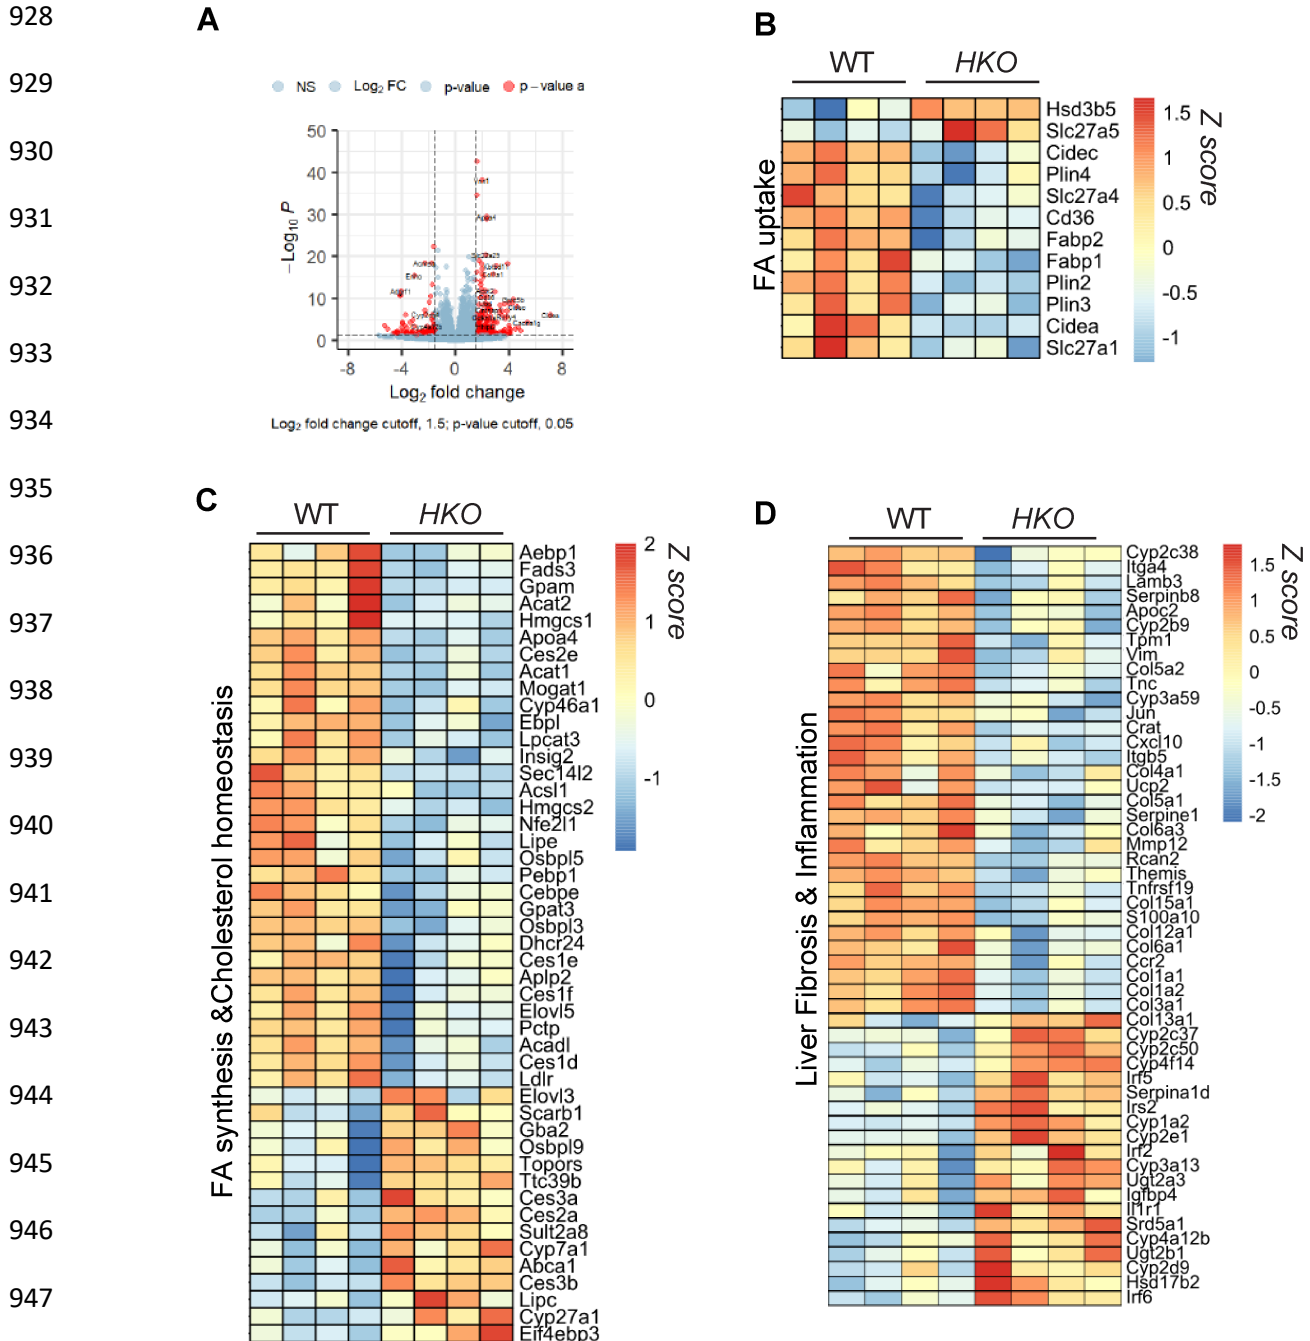

**Figure 3. RNA-seq in NAFLD livers reveals global changes in gene expression regulated by miR-33. (A)** Volcano plot showing significant DEGs ( $P_{adj} < 0.05$ , change  $> \text{Log}_2$  fold 1.5) in hepatocyte specific miR-33 knockout (HKO) vs. WT livers from mice fed with CD-HFD for 3 months. **(B-D)** Heatmaps of pathways relevant to NAFLD progression in livers from WT and HKO mice. Cutoff values were settled as Fold change  $> \text{Log}_2$  1.5 and  $P_{adj} < 0.05$ .

951

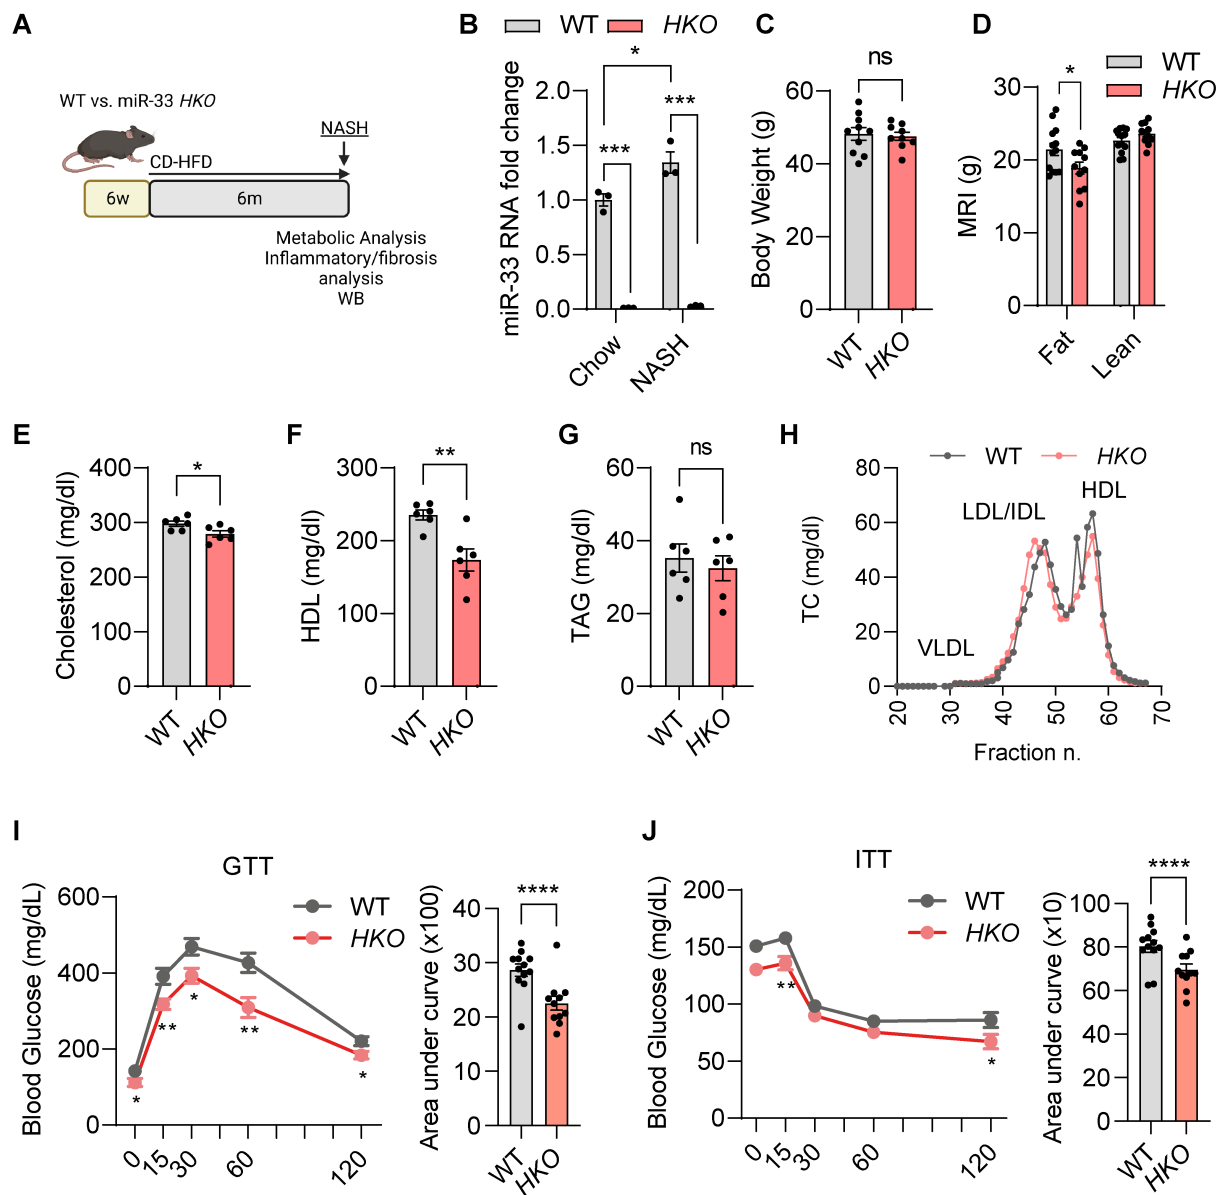

**Figure 4. Systemic metabolism changes in miR-33 *HKO* mice at NASH stage.** (A) Schematic representation of the experimental design to analyze steatosis/NAFL in WT and hepatocyte specific miR-33 knockout (*HKO*) mice fed with a CD-HFD for 6 months. (B) qPCR analysis of miR-33 expression in WT and *HKO* hepatocytes fed a control or CD-HFD for 6 months. (C,D) Body weight (C) and body composition (D) analysis in WT and *HKO* mice. (E-G) Levels of total cholesterol (E), HDL-C (F), and TAGs (G) in plasma of WT and *HKO* mice. (H) Cholesterol content of FPLC-fractionated lipoproteins from pooled plasma of 6 WT and 6 *HKO* mice. (I, J) GTT (I) and ITT (J) in WT and *HKO* mice with areas under the curve. Data represent the mean  $\pm$  SEM (\* $P \leq 0.05$ , \*\* $P \leq 0.01$ , \*\*\* $P \leq 0.001$ , \*\*\*\* $P \leq 0.0001$  compared with WT animals, 2-way ANOVA followed by Tukey's multiple comparison (B) and unpaired Student's *t* test for 2 group comparisons).

952

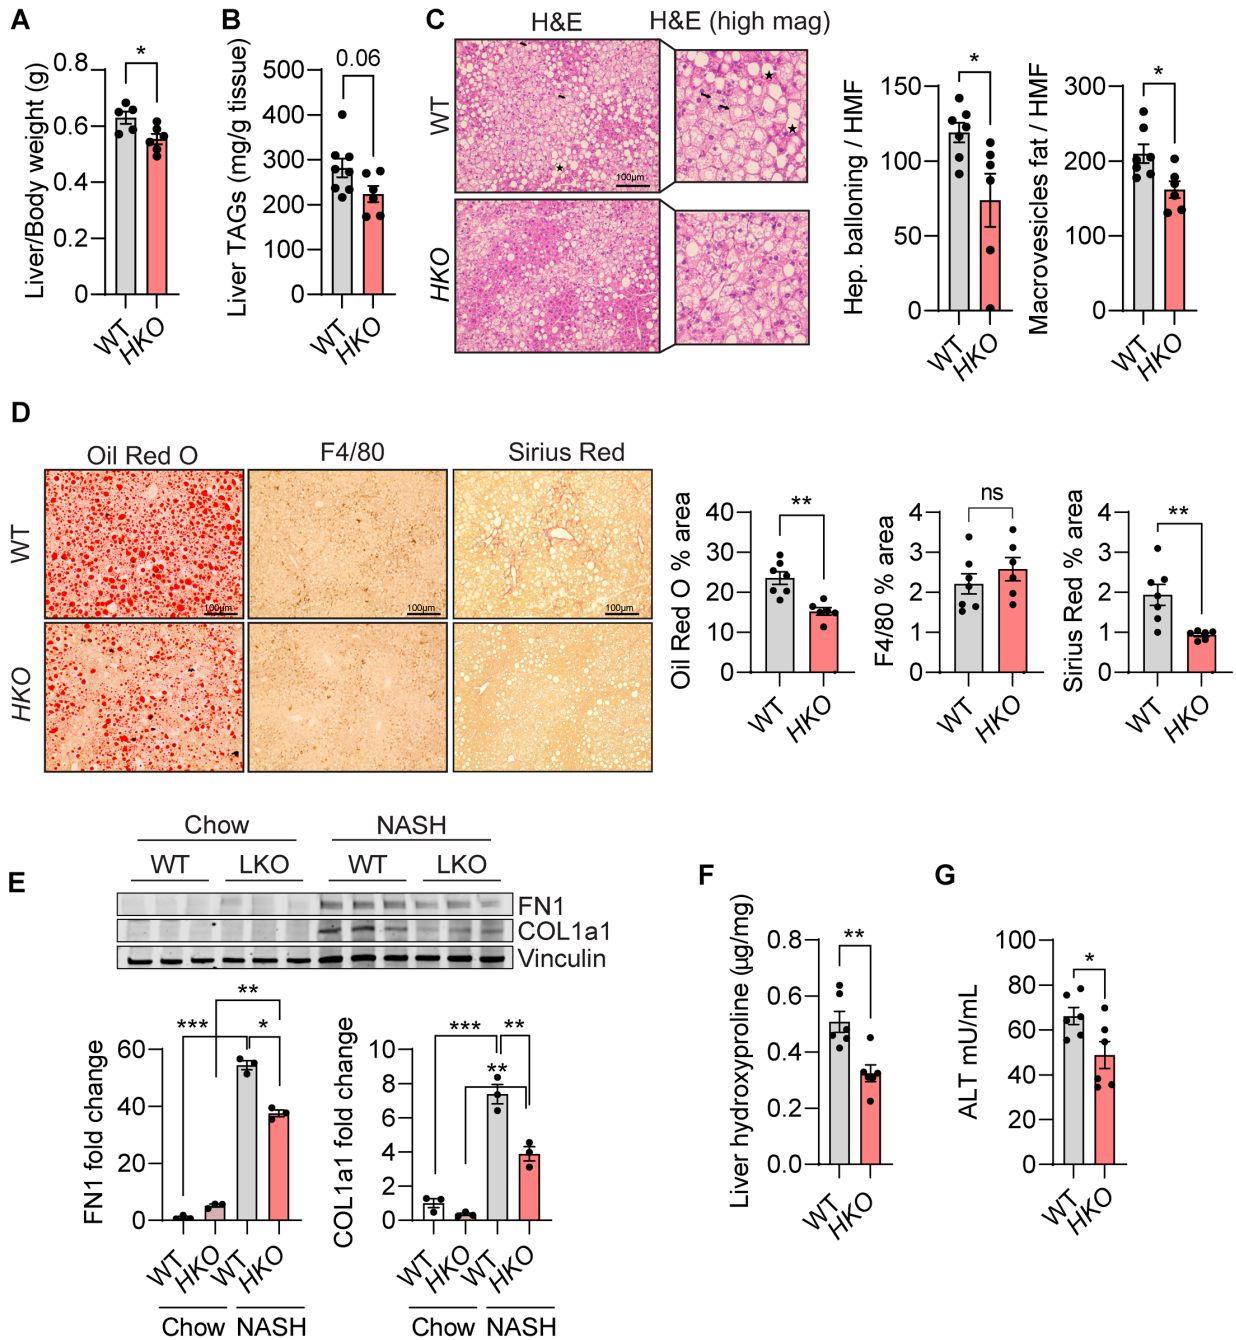

**Figure 5. Loss of hepatic miR-33 protects from liver injury and NASH.** (A and B) Liver weight (A) and liver TAG (B) in WT and hepatocyte specific miR-33 knockout (*HKO*) mice fed with CD-HFD for 6 months. (C-D) Representative images of H&E, Oil Red O (ORO), F4/80 and Sirius Red-stained livers from WT and *HKO* mice. Indicated quantification on the right. (E) Western blot and densitometric analysis of FN1, COL1a1 and housekeeping standard VINCULIN in WT and *HKO* livers fed chow or CD-HFD for 6 months (indicated as Chow and NASH, respectively in the panel). (F) Hydroxyproline content in NASH WT and *HKO* livers. (G) Serum ALT in NASH WT and *HKO* mice. Data represent the mean  $\pm$  SEM (\* $P \leq 0.05$ , \*\* $P \leq 0.01$ , \*\*\* $P \leq 0.001$  compared with WT animals, unpaired Student's *t* test for 2 group comparisons and 2-way ANOVA followed by Tukey's multiple comparison (E).

954  
955  
956

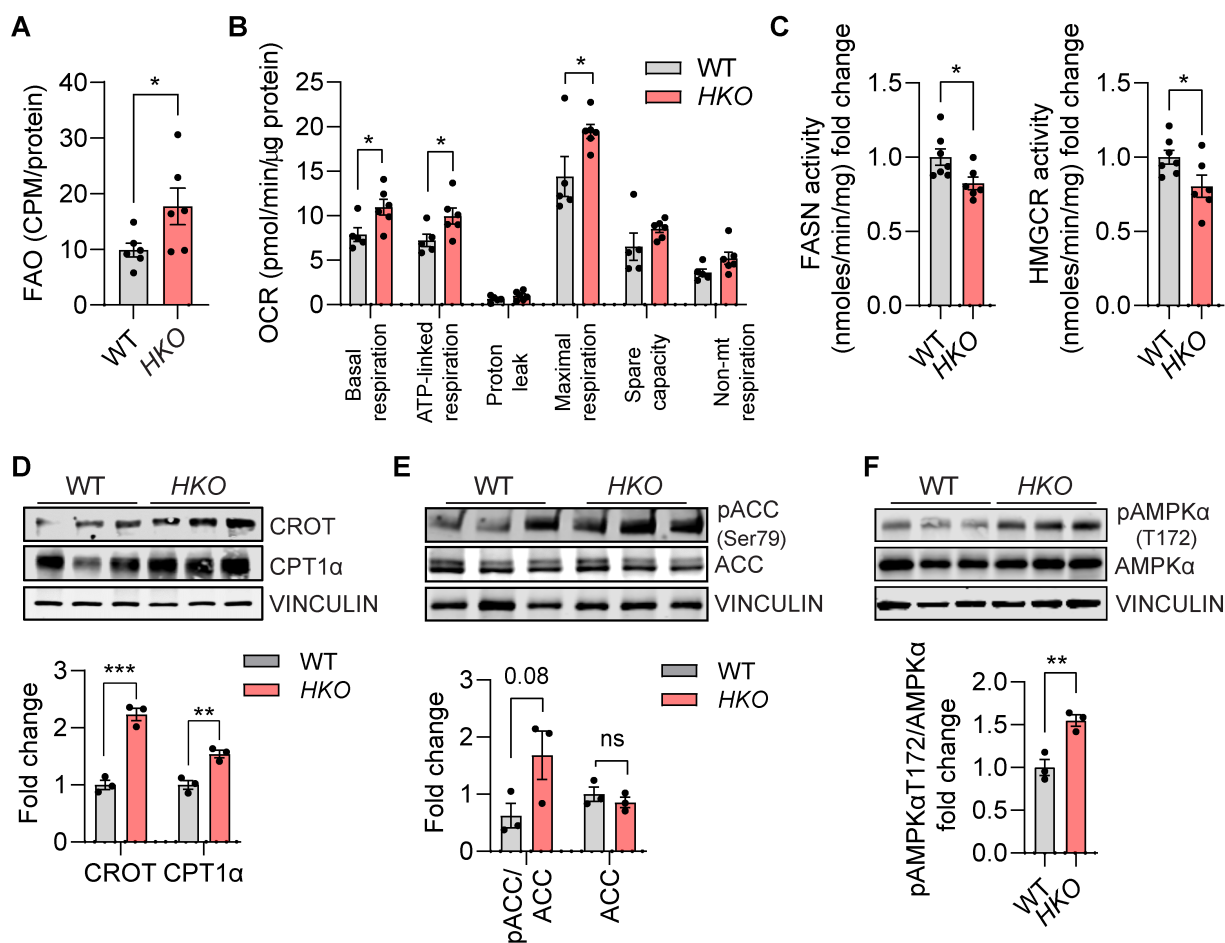

**Figure 6. Metabolic characterization of miR-33 *HKO* mice at NASH stage.** (A) *Ex vivo* Analysis of FAO in WT and hepatocyte specific miR-33 knockout (*HKO*) livers from mice fed with CD-HFD for 6 months. (B) Mitochondrial respiratory analysis inferred from OCR measurements of primary mouse hepatocytes isolated from WT and miR-33 *HKO* livers. (C) Enzymatic activity of FASN and HMGCR in WT and *HKO* livers. (D-F) Western blot and densitometric analysis of CROT, CPT1α, pACC (Ser79), total ACC, pAMPKα (T172), total AMPKα and housekeeping standard VINCULIN in WT and *HKO* livers. Data represent the mean ± SEM (\*P ≤ 0.05, \*\*P ≤ 0.01, \*\*\*P ≤ 0.001 compared with WT animals, unpaired Student's *t* test for 2 group comparisons).

957  
958  
959  
960  
961

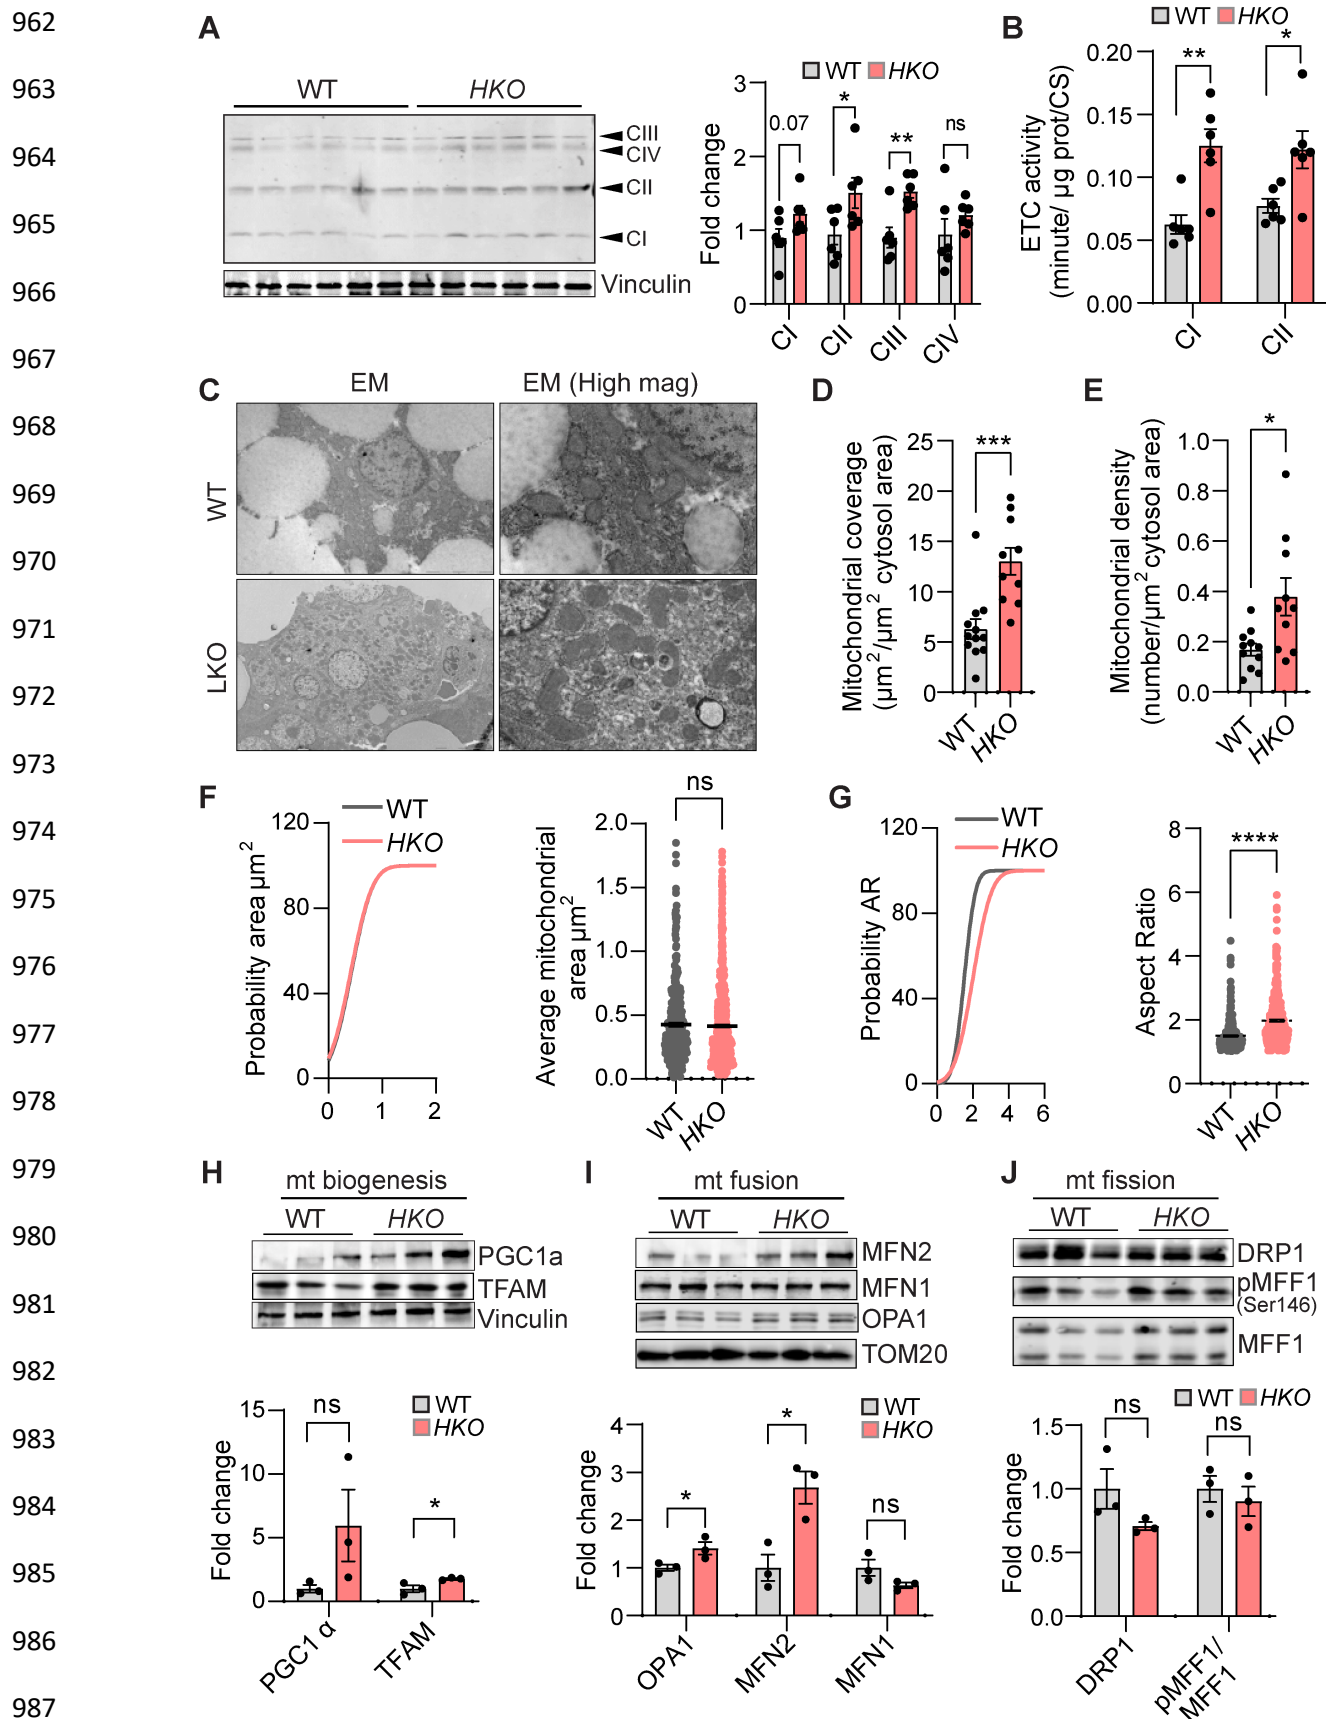



**Figure 7. Impact of miR-33 deficiency on mitochondrial homeostasis and morphology.** (A) Western blot and densitometric analysis of different mitochondrial subunits blotted with the Total OXPHOS Rodent WB Antibody Cocktail (ab110413) and housekeeping standard VINCULIN in WT and hepatocyte specific miR-33 knockout (*HKO*) livers from mice fed with CD-HFD for 6 months. (B) Activity of the ETC Complex I and Complex II in NASH livers. Enzyme activities are expressed as change in absorbance / minute /  $\mu\text{g}$  protein / CS activity. (C) Representative electron micrographs of mitochondria profiles in WT and *HKO* hepatocytes from NASH livers. (D-G) Mitochondrial coverage (D), Mitochondrial density (E) and cumulative distribution and mean of mitochondrial area (F) and mitochondria aspect ratio (G) from WT and *HKO* hepatocytes. (H-J) Western blot and densitometric analysis of (H) PGC1 $\alpha$  and TFAM; (I) MFN2, MFN1, OPA1; (J) DRP1, p-MFF1 (Ser146), MFF1 and housekeeping standard VINCULIN or TOM20 in WT and *HKO* livers. Data represent the mean  $\pm$  SEM (\* $P \leq 0.05$ , \*\* $P \leq 0.01$ , \*\*\* $P \leq 0.001$ , \*\*\*\* $P \leq 0.0001$  compared with WT animals, unpaired Student's *t* test for 2 group comparisons).

988

989

990

991

992

993

994

995

996

997

998

999

1000

1001

1002

1003

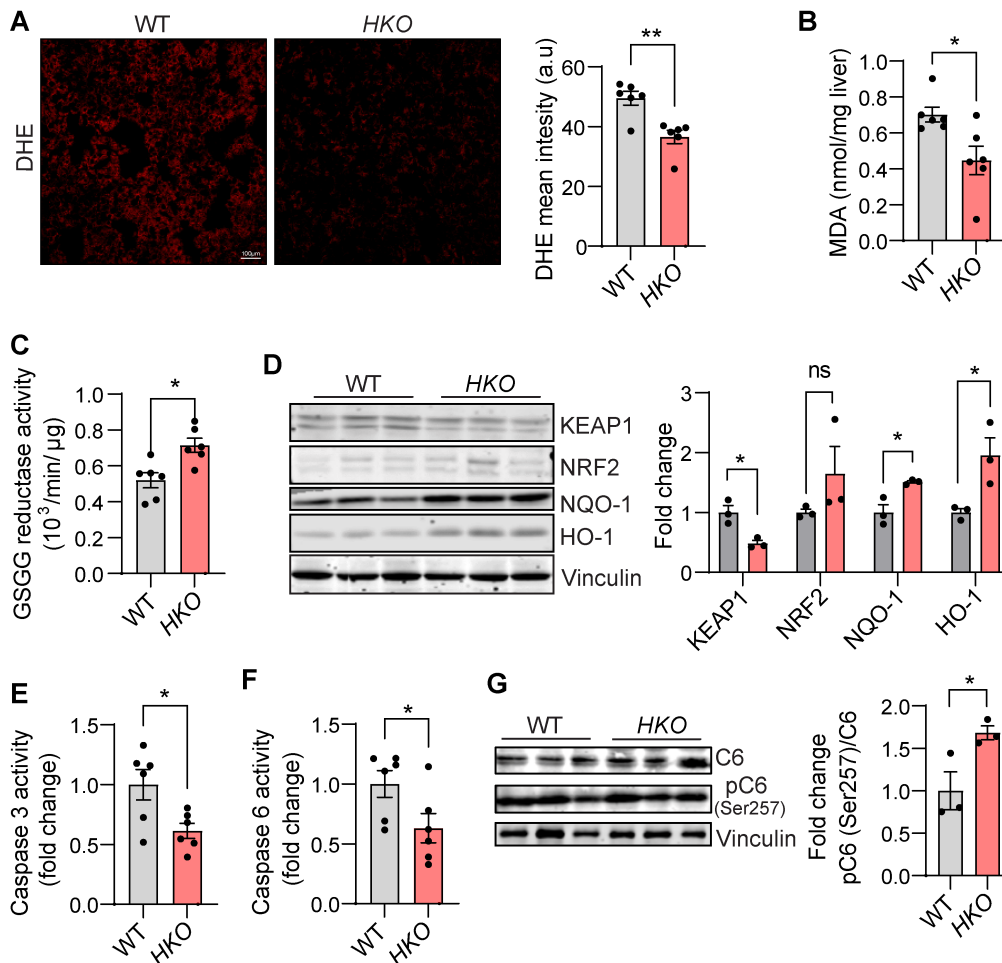

**Figure 8. Genetic ablation of miR-33 in hepatocytes attenuates hepatic oxidative stress and cell death in NASH.** (A) Representative DHE staining and quantification in WT and hepatocyte specific miR-33 knockout (*HKO*) livers from mice fed with CD-HFD for 6 months. (B) Lipid peroxidation measured by MDA assay in NASH livers. (C) Glutathione reductase activity measured in NASH livers. Data represented as change in absorbance / minute/  $\mu\text{g}$  of protein). (D) Western blot and densitometric analysis of KEAP1, NRF2, NQO-1 and HO-1 and housekeeping standard VINCULIN in Wt and *HKO* livers. (E, F) Fold change in Caspase 3 and Caspase 6 activity in NASH livers. (G) Western blot analysis and densitometric analysis of p-Caspase 6 (Ser257) and Caspase 6 and housekeeping standard VINCULIN in WT and *HKO* NASH livers. Data represent the mean  $\pm$  SEM (\* $P \leq 0.05$ , \*\* $P \leq 0.01$ , compared with WT animals, unpaired Student's *t* test for 2 group comparisons).

1004  
1005  
1006  
1007  
1008  
1009  
1010  
1011  
1012  
1013  
1014  
1015  
1016

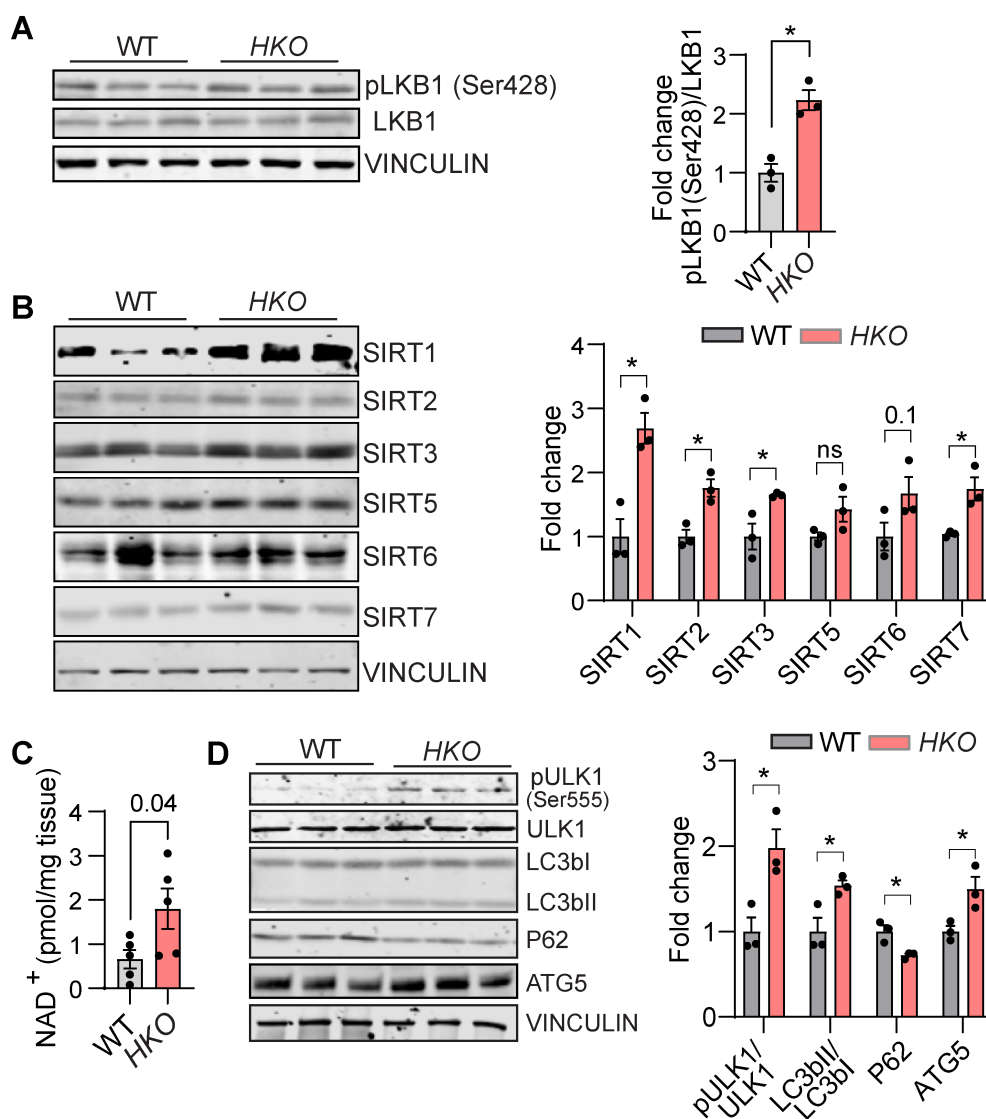

**Figure 9. Upstream and downstream AMPK $\alpha$  signaling pathway is altered in hepatocyte deficient miR-33 livers.** (A, B) Western blot analysis and densitometric analysis of (A) p-LKB1 (Ser428) (long and short exposure), LKB1; (B) SIRT1, SIRT2, SIRT3, SIRT5, SIRT6, SIRT 7 and housekeeping standard VINCULIN in WT and hepatocyte specific miR-33 knockout (*HKO*) livers from mice fed with CD-HFD for 6 months. (C) NAD<sup>+</sup> levels in WT and *HKO* NASH livers represented as pmol/mg of tissue. (D) Western blot analysis and densitometric analysis of p-ULK1 (Ser555), ULK1, LC3bI/II, P62/SQSTM1, ATG5 and housekeeping standard VINCULIN in WT and *HKO* NASH livers. Data represent the mean  $\pm$  SEM (\* $P \leq 0.05$ , \*\* $P \leq 0.01$ , compared with WT animals, unpaired Student's *t* test for 2 group comparisons).

1017

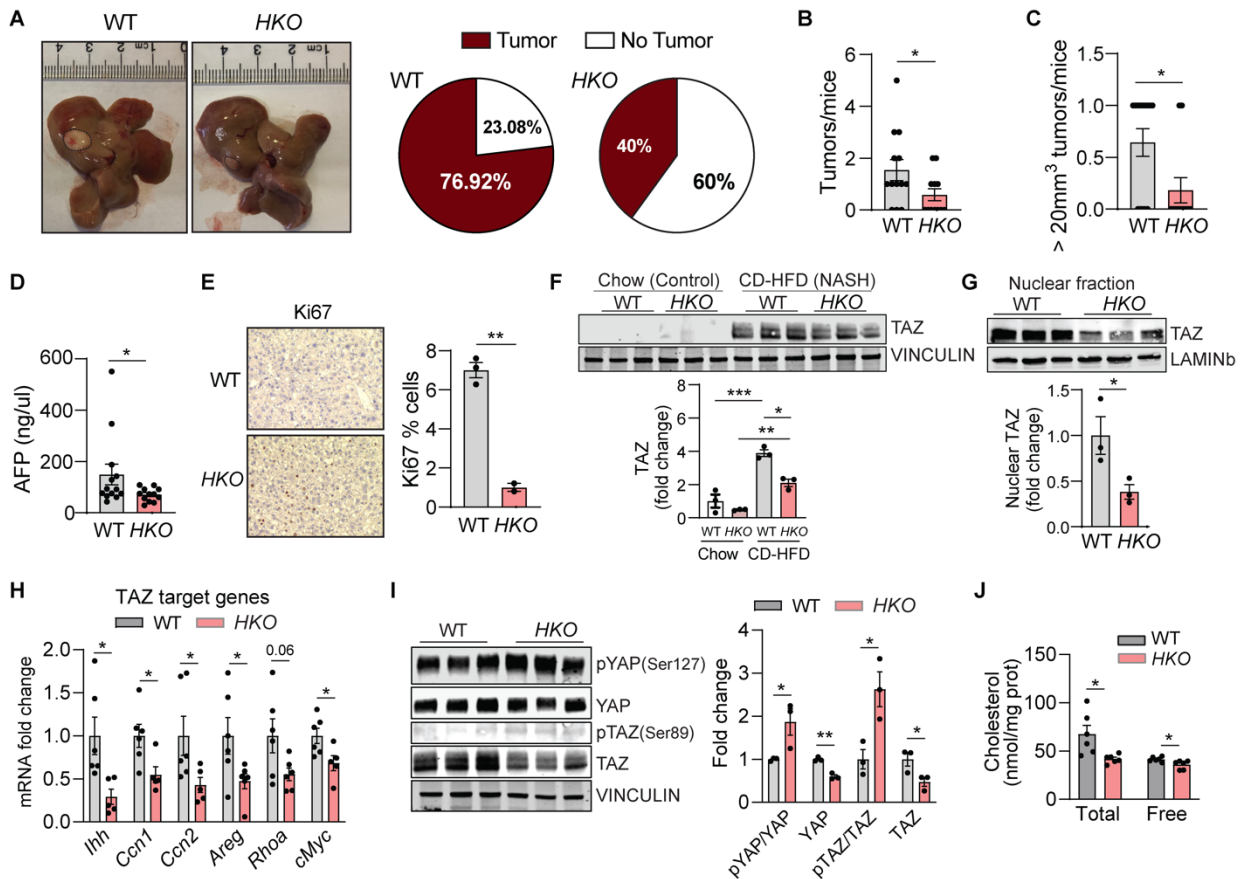

1018

**Figure 10. Absence of hepatocyte miR-33 decreased Hippo signaling pathway and hepatic tumor incidence.** (A) Representative images of WT and hepatocyte specific miR-33 knockout (*HKO*) livers after 15 months of CD-HFD, dashed line used to outline tumors (right panel). Graphical representation of tumor incidence in WT and *HKO* mice (left panel). (B) Total number of tumors/mouse and (C) Number of tumors larger >20mm<sup>3</sup>/mouse found in WT and *HKO* livers after 15 months of CD-HFD. (D) Circulating AFP levels in WT and *HKO* mice after 15 months of CD-HFD. (E) Representative images of Ki67 staining in liver tumors from WT and *HKO* mice after 15 months on CD-HFD. Quantification is shown on the right panel. (F) Western blot and densitometric analysis of TAZ and housekeeping standard VINCULIN in WT and *HKO* livers fed chow and CD-HFD for 6 months. (G) Western blot and densitometric analysis of TAZ and housekeeping standard LAMINb in nuclear liver fractions from WT and *HKO* liver after 6 months of CD-HFD. (H) qPCR analysis of mRNA expression of TAZ-responsive genes including *Ihh*, *Ccn1*, *Ccn2*, *Areg*, *Rhoa*, *cMYC* in WT and *HKO* livers after 6 months on CD-HFD. (I) Western blot and densitometric analysis of p-YAP (Ser127), YAP, p-TAZ (ser89) TAZ, and housekeeping standard VINCULIN in WT and *HKO* livers after 6 months on CD-HFD. (J) Hepatic total and free cholesterol levels in WT and *HKO* mice fed a CD-HFD for 6 months of measured by GC-MS. Data represented as nmol of cholesterol/mg of liver protein. Data represent the mean ± SEM (\*P ≤ 0.05, \*\*P ≤ 0.01, \*\*\*P ≤ 0.001 compared with WT animals, unpaired Student's *t* test for 2 group comparisons).

1019

1020

1021

1022

1023

1024

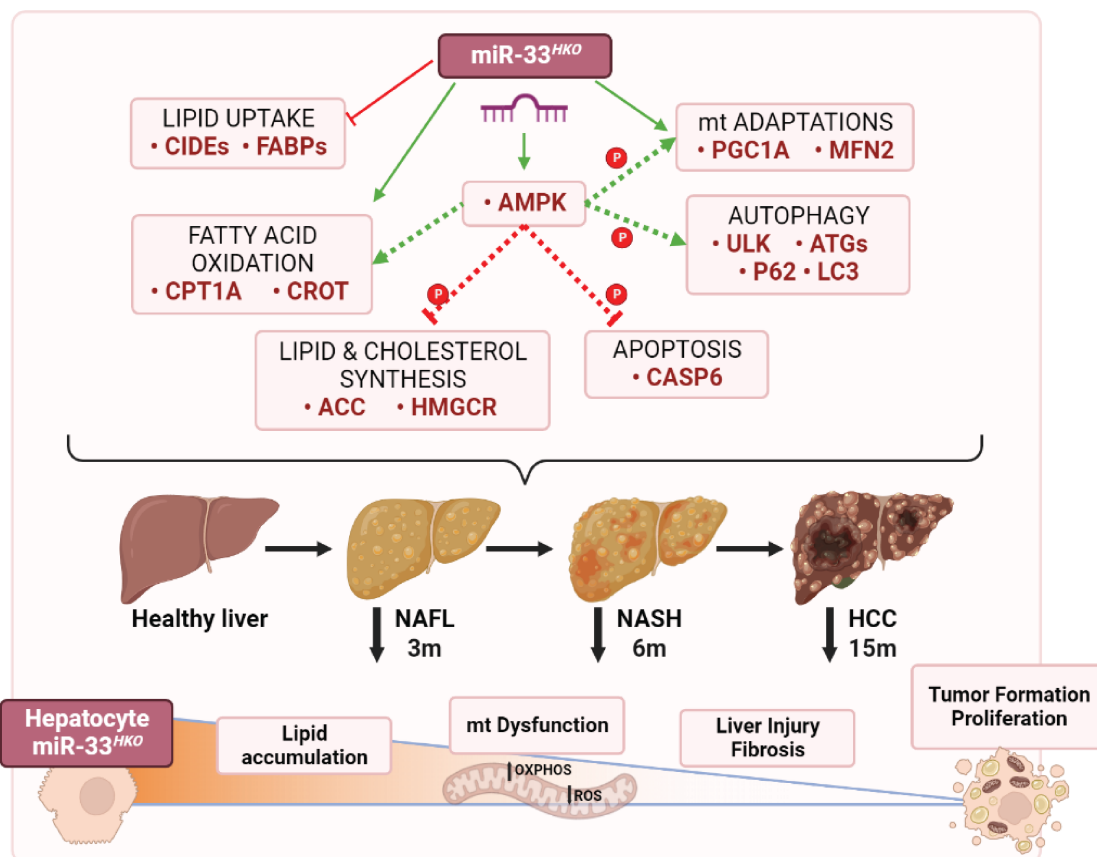

1025

1026

1027

1028

1029

1030

Figure 11. Schematical representation of miR-33 mechanism of action.
